# Supplementary material for: Efficient LED-driven MOF-catalysis for aerobic C–H and C–C bond oxidation
Source: Royal Society of Chemistry journal article supplement (doi:10.1039/d4cy00892h), 2024-01-01
Supplement: d4cy00892h1.pdf [file d4cy00892h1.pdf]

## Supporting Information

### **The Efficient LED-Driven MOF-Catalysis for Aerobic C-H and C-C Bond Oxidation**

Mehdi Sheykhani<sup>\*,a,b</sup> Mona Bahmani,<sup>b</sup> Masoumeh Abbasnia<sup>a</sup>

<sup>a</sup>Department of Organic Chemistry, Faculty of Basic Sciences, Tarbiat Modares University, P.O. Box 14155-4838, Tehran, Iran

<sup>b</sup>Chemistry Department, University of Guilan, P.O. Box 41335-1914, Rasht, Iran

#### **Table of contents:**

|                                |         |
|--------------------------------|---------|
| 1. Experimental section        | S2-S3   |
| 2. Characterization            | S3-S8   |
| 3. Reaction analyses           | S9-S10  |
| 4. Copies of <sup>1</sup> HNMR | S11-S33 |

## 1. Experimental section

### 1.1. Materials and instruments

All of the chemicals were purchased from commercial sources.  $\text{Fe}_3\text{O}_4$ ,  $\text{SiO}_2$  supported on  $\text{Fe}_3\text{O}_4$ , linked to APTMS as well as MIL-88A were prepared according to the literature.  $\text{SiO}_2$  used in mechanistic study is commercial silicagel 60 (0.015-0.040 mm, 115111 merck catalog no.). Maghemite was synthesized by calcination of magnetite at 300 °C, 3h. FT-IR spectra were recorded on an Agilent Cary 630 ATR-FTIR spectrophotometer. Thermogravimetric analyses (TGA) were carried out under  $\text{N}_2$  atmosphere on a NETZSCH STA 409PC/PG instrument at a heating rate of 10 °C  $\text{min}^{-1}$ .  $^1\text{H}$  NMR spectra were recorded on Bruker 500 MHz NMR spectrometers and the chemical shifts were reported relative to TMS. Powder X-ray diffractions were studied by Philips X'Pert MBD on  $\text{Co K}\alpha$  (1.789 Å) tube.  $\text{N}_2$  adsorption/desorption isotherms were analyzed by Micromeritics ASAP 2020 surface area analyzer.

### 1.2. Synthesis of magnetic support

Magnetic support of the catalyst was prepared according to the literature.<sup>1</sup> Briefly, after dissolving  $\text{FeCl}_2$  (2.5 mmol) and  $\text{FeCl}_3$  (2 equiv) in 20 mL water, 35 mL aq.  $\text{NH}_3$  was added drop-wise under vigorous stirring. 20 mL TEOS was added slowly at 90 °C, stirring was continued for 12 h. The resulting silica supported magnetite was decanted by a magnet and washed with water and EtOH. The resulted dark-brownish solid was dried at 70 °C. 1 g of the prepared solid was dispersed in 15 mL toluene and then 4.5 mL APTMS was added to the suspension and refluxed for 8 h under  $\text{N}_2$  gas. Finally, the product was decanted by magnetic, washed thoroughly with DCM, and dried at 50 °C.

### **1.3. Synthesis of magnetic MIL-88A**

Magnetic MIL-88A was synthesized according literature by some modifications. In the presence of 0.1 g magnetic support, 4.2 mmol fumaric acid (0.485 g) and 4.2 mmol  $\text{FeCl}_3 \cdot 6\text{H}_2\text{O}$  (1.13g) were dissolved in 20 mL water and stirred at r.t for 1 h. Resulted suspension transferred into a Teflon-lined steel autoclave 70 °C for 8 h. After cooling to rt. washing with hot water and EtOH, the product dried at 100 °C to gain magnetic MIL-88A.

## **2. Characterization**

### **2.1. Powder XRD of the magnetic MIL-88A**

To determine the phases that is present in the synthesized compound, PXRD analysis used. The data were collected in Co radiation ( $\lambda = 1.789 \text{ \AA}$ ) at 293 K. Patterns at  $2\theta$ : 12.7°, 14.0° are clearly appeared showing the presence of MIL-88A. Patterns at around 35.1°, 41.0°, 50.1° are related to cubic crystals of magnetite and broad peak at 20-30 is due to amorphous  $\text{SiO}_2$  (Figure S1).

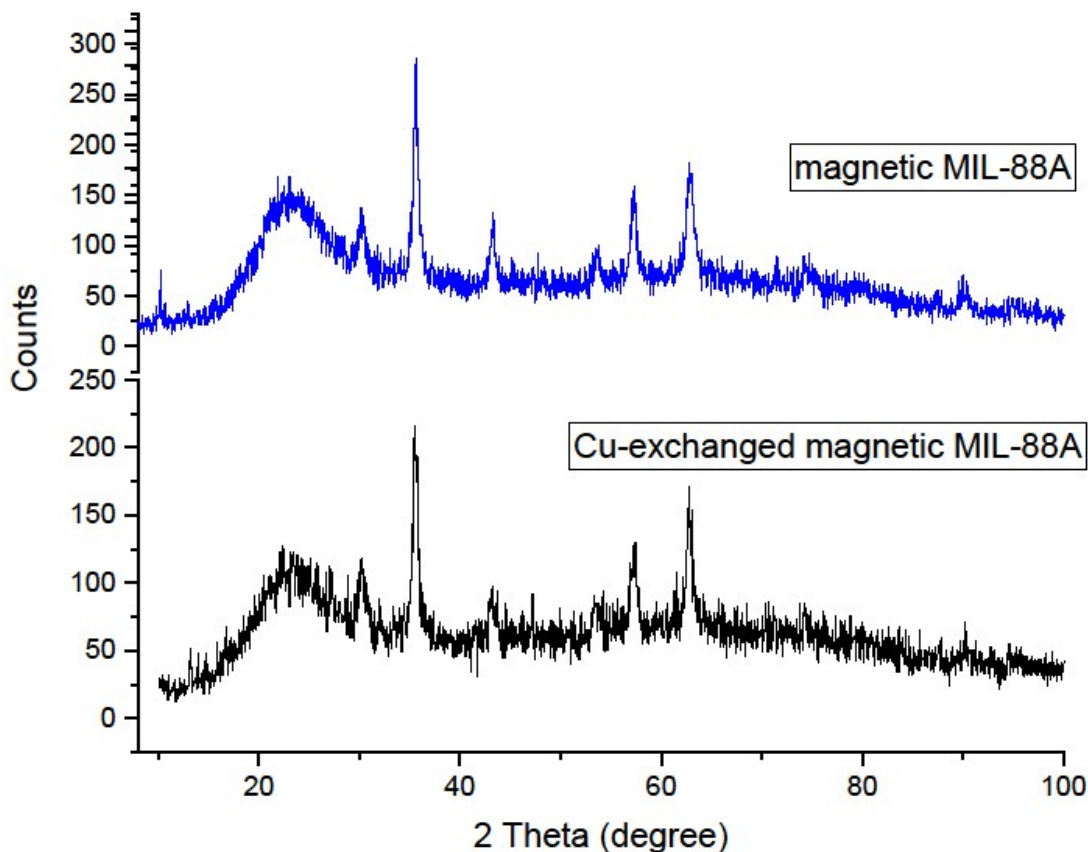

**Figure S1.** Powder XRD of the magnetic MIL-88A; and Cu-exchanged magnetic MIL-88A

## 2.2. FTIR spectrum on the magnetic MIL-88A

As shown in FTIR of MIL-88A, bands at  $1397\text{ cm}^{-1}$  and  $1608\text{ cm}^{-1}$  are related to the symmetric and asymmetric C=O stretching vibrations of fumarate linkers. The characteristic band of Fe-oxo group is clear at  $585\text{ cm}^{-1}$  whereas bands related to the carbonyl and C-H bending appeared at  $645\text{ cm}^{-1}$  and  $677\text{ cm}^{-1}$ , respectively. Stretching mode of O-H bonds of adsorbed water caused a broad band around  $2500\text{--}3500\text{ cm}^{-1}$ . In FTIR of magnetic support  $815\text{ cm}^{-1}$  and  $1109\text{ cm}^{-1}$  are caused by symmetric and asymmetric stretching of Si-OSi bonds, respectively. Bands at  $2945\text{ cm}^{-1}$  and  $2956\text{ cm}^{-1}$  are related to C-H stretching of APTMS linker.

As it is clear, most intense bands of magnetic support and MIL-88A are appeared in the prepared magnetic MIL-88A.

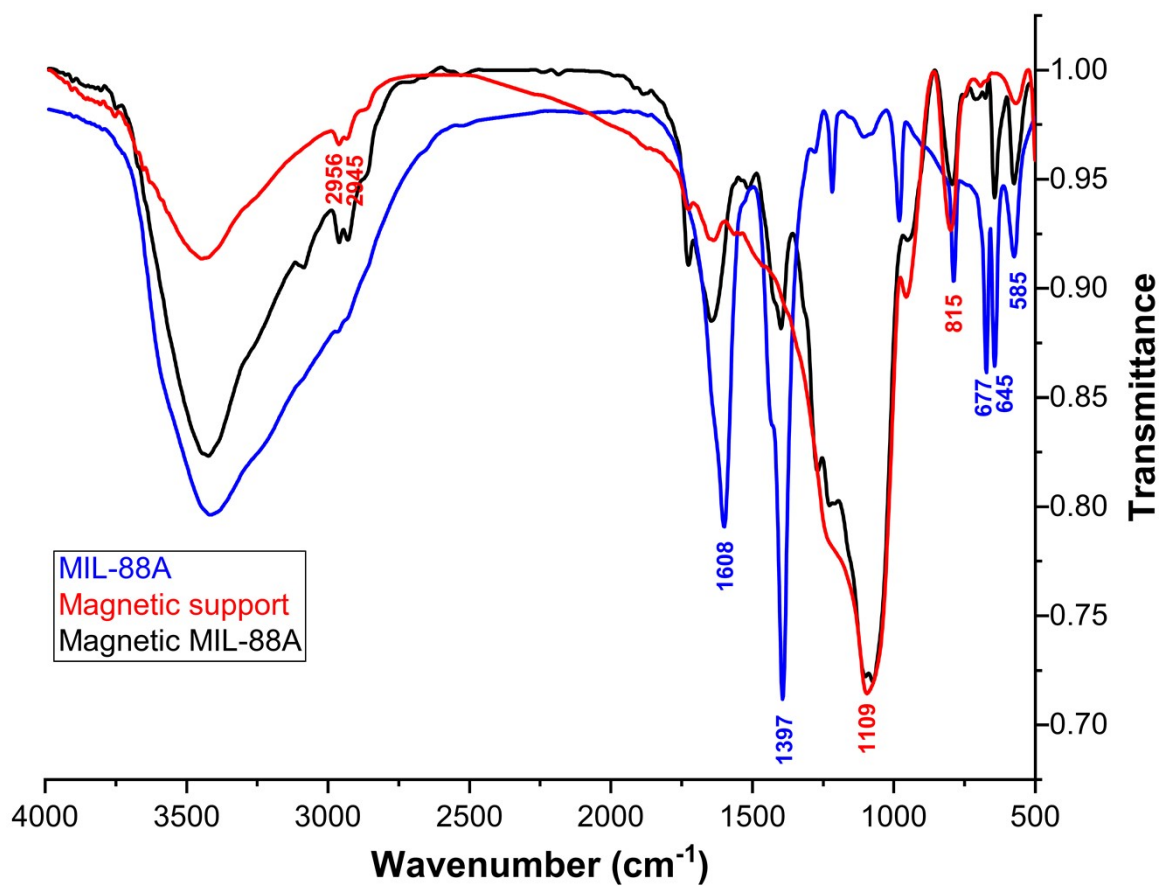

**Figure S2.** FTIR spectra of the magnetic support, MIL-88A and magnetic MIL-88A

### 2.3. SEM photographs

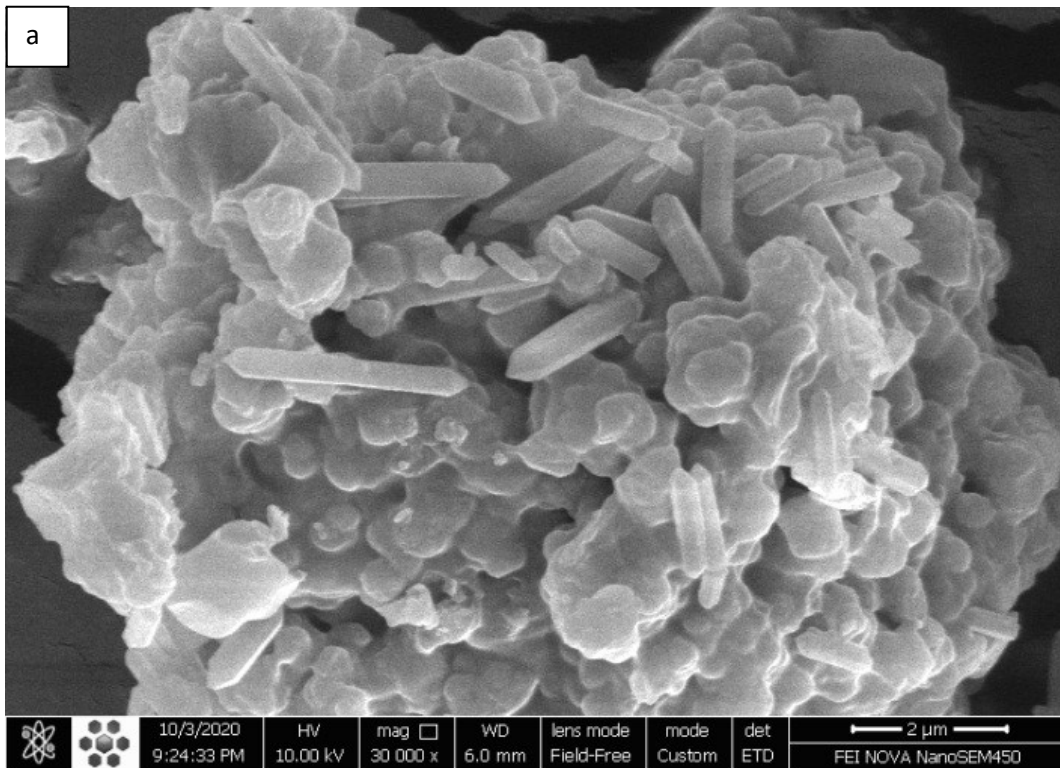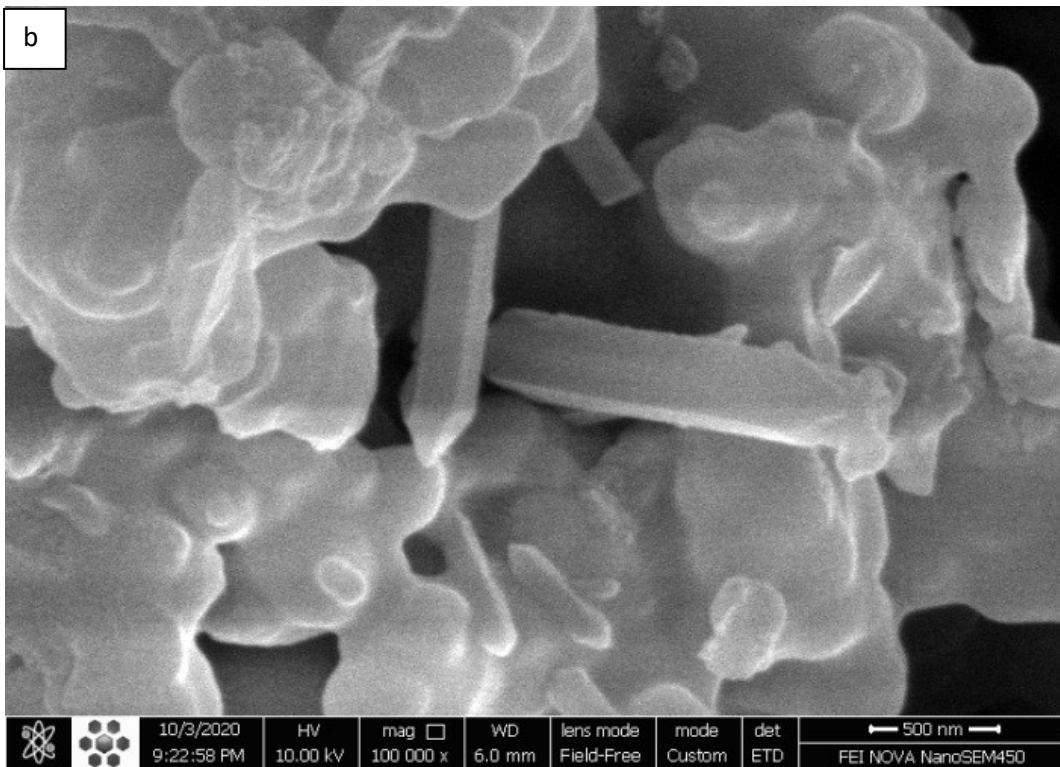

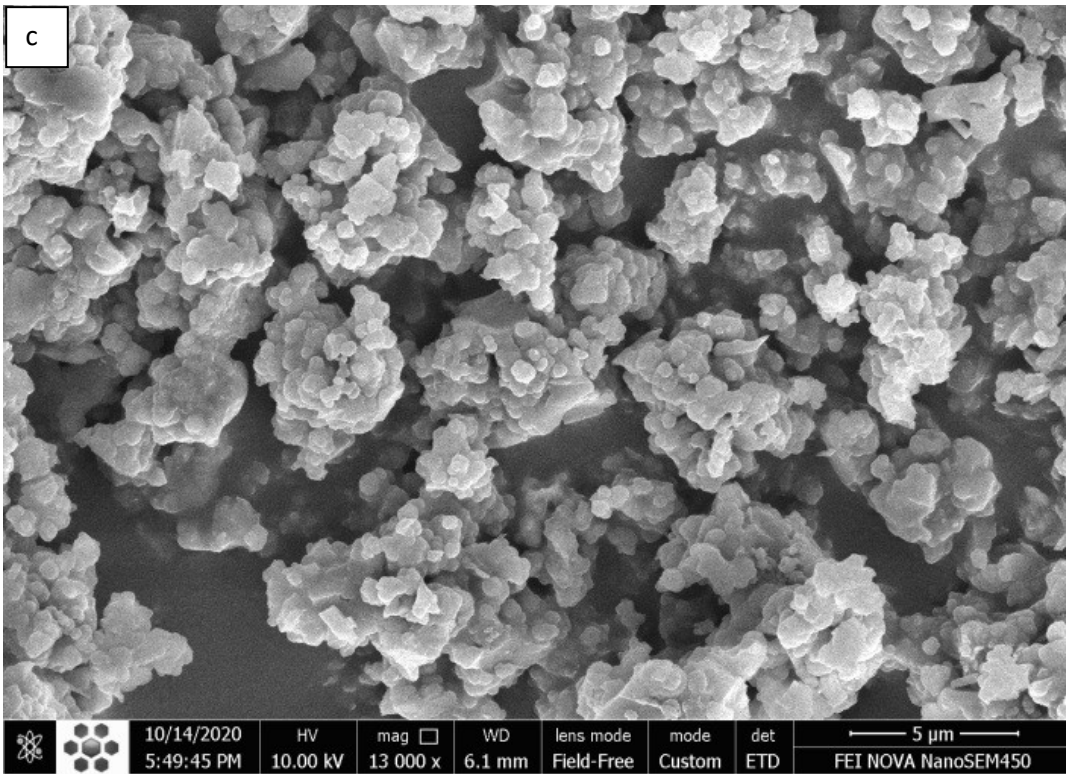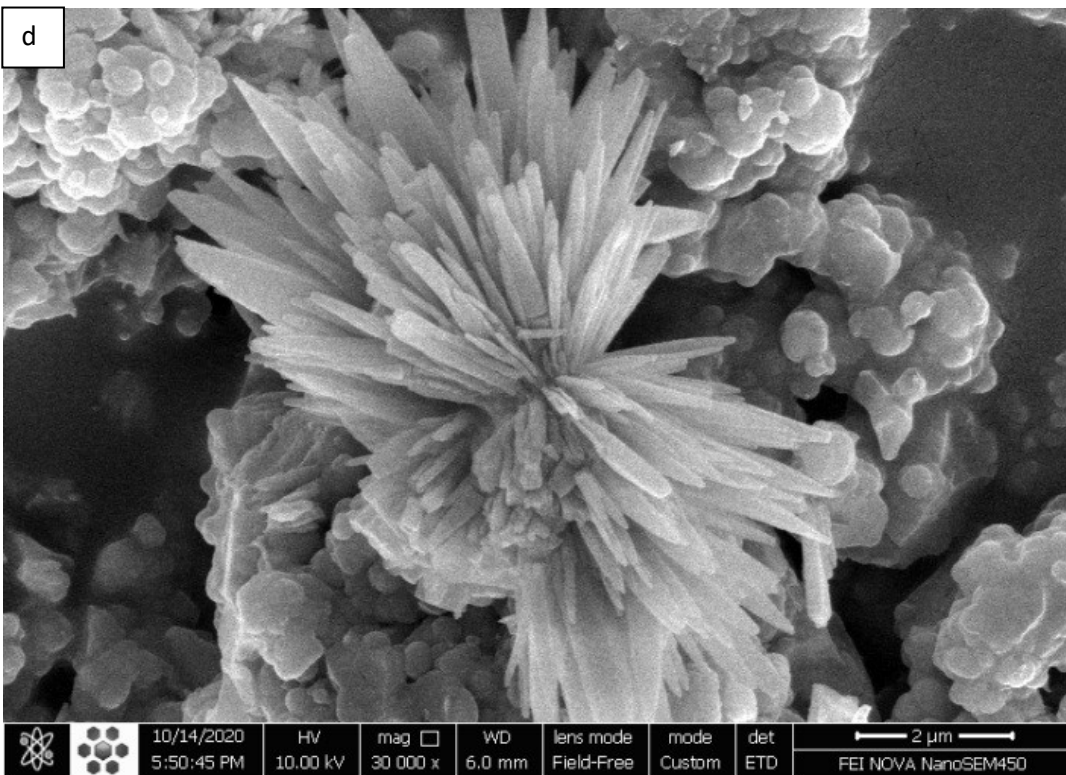

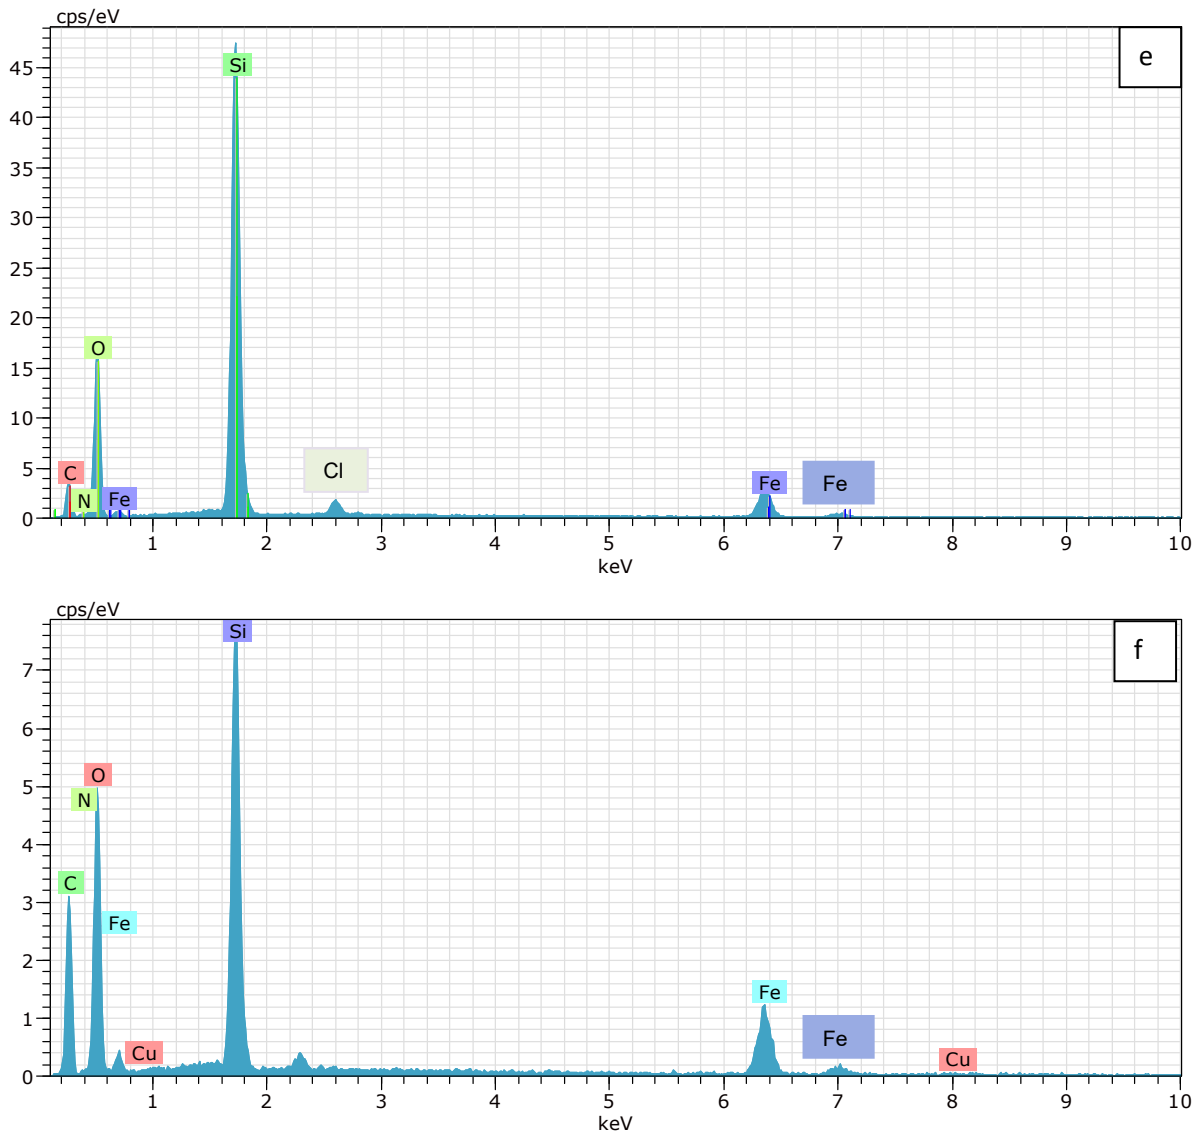

**Figure S3.** SEM micrograph of the prepared catalysts (a-b) magnetic MIL-88A; (c-d) Cu-exchanged magnetic MIL-88A and (e-f) elemental analyses EDS of the synthesized compounds



### 3. Reaction analyses

#### 3.1. A typical method for the photo-induced aerobic oxidation

Substrate (0.3 mmol) and magnetic MIL-88A (15 mg, 0.7 mol%) in acetonitrile (0.6 mL) were stirred at room temperature and 7w blue LED under O<sub>2</sub> balloon for 20 h. The catalyst was recovered by using an external magnet, washed twice with CH<sub>3</sub>CN and was reused in a new run. Crude product was purified by column chromatography without need to aqueous workup. <sup>1</sup>HNMR was used to determine purity of the products by comparison of results with the literature while the conversion of substrate, the yield and selectivity of product were obtained by GC analysis.

#### 3.2. Study of the turnover number for the aerobic oxidation of toluene catalyzed by magnetic MIL-88A

Toluene (0.1 mmol) and magnetic MIL-88A (5 mg, 0.7 mol%) in acetonitrile (0.2 mL) were stirred under blue light (7w) under O<sub>2</sub> balloon at rt. The reaction was analyzed by GC to determine the conversion of toluene and TON.

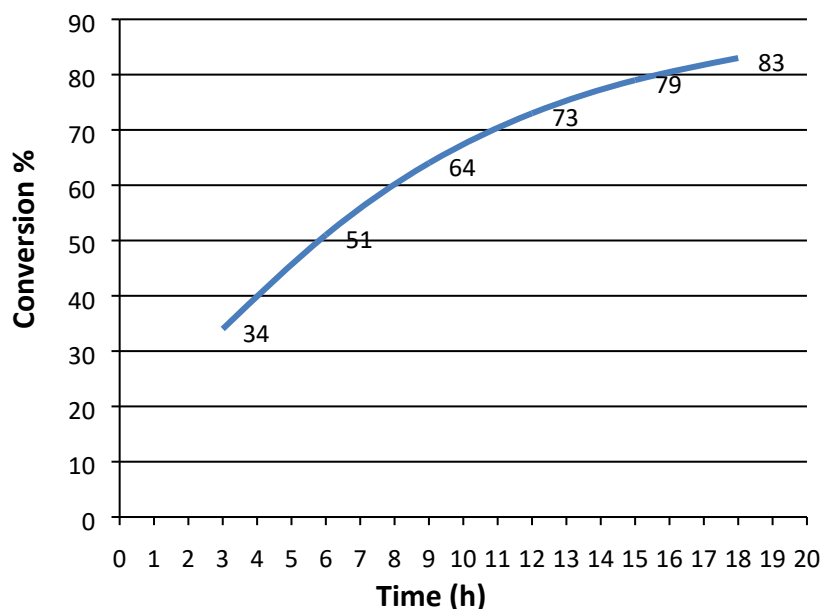

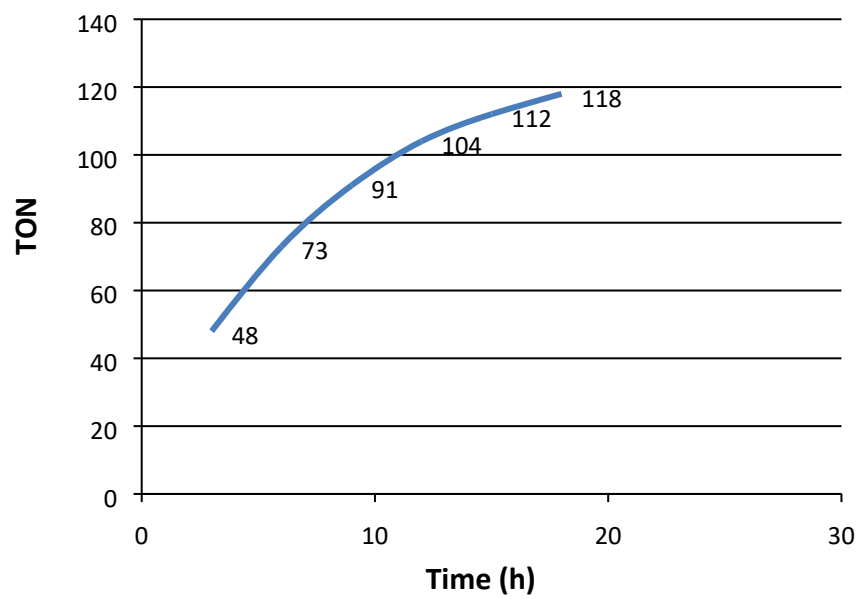

**Figure S4.** Reaction profile under optimized conditions

## 4. Copies of <sup>1</sup>H NMR

SpinWorks 4: m.rezanoor benzaldehyde 1HNMR in CDCl3 at 298k 1398/09/30

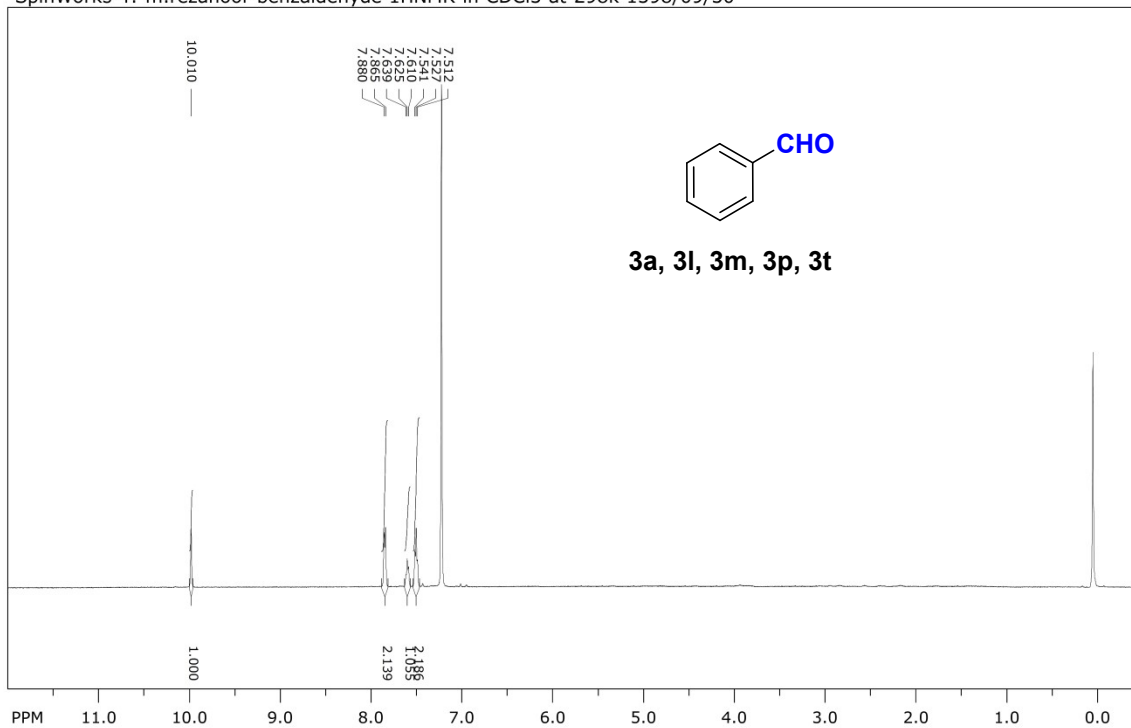

file: ...rezanoor\MIL-88a\behnzaldehyde\fid exp: <zg30>  
transmitter freq.: 500.134501 MHz  
time domain size: 30988 points  
width: 10964.91 Hz = 21.9239 ppm = 0.353844 Hz/pt  
number of scans: 384

freq. of 0 ppm: 500.130019 MHz  
processed size: 32768 complex points  
LB: 0.300 GF: 0.0000  
Hz/cm: 249.826 ppm/cm: 0.49952

SpinWorks 4: m.rezanoor benzaldehyde 1HNMR in CDCl3 at 298k 1398/09/30

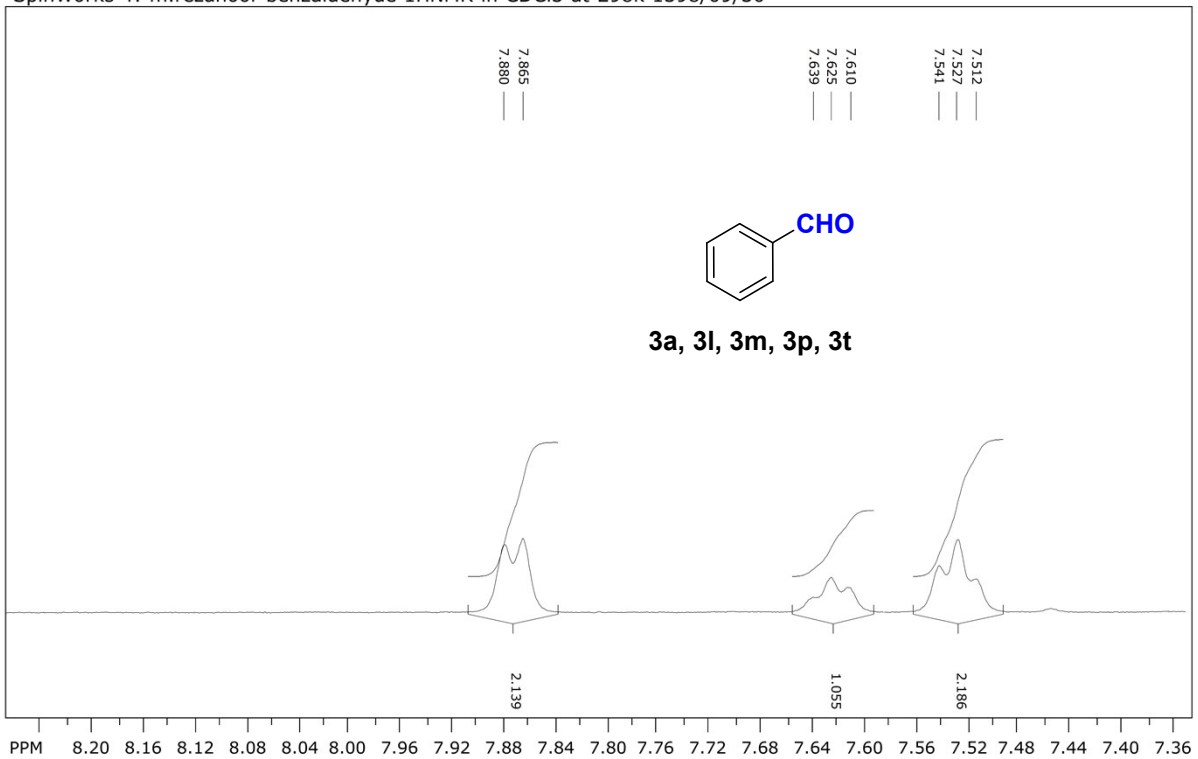

file: ...rezanoor\MIL-88a\behnzaldehyde\fid exp: <zg30>  
transmitter freq.: 500.134501 MHz  
time domain size: 30988 points  
width: 10964.91 Hz = 21.9239 ppm = 0.353844 Hz/pt  
number of scans: 384

freq. of 0 ppm: 500.130019 MHz  
processed size: 32768 complex points  
LB: 0.300 GF: 0.0000  
Hz/cm: 18.436 ppm/cm: 0.03686

SpinWorks 4: A6 1HNMR in CDCl3 at 298k 1398/02/15

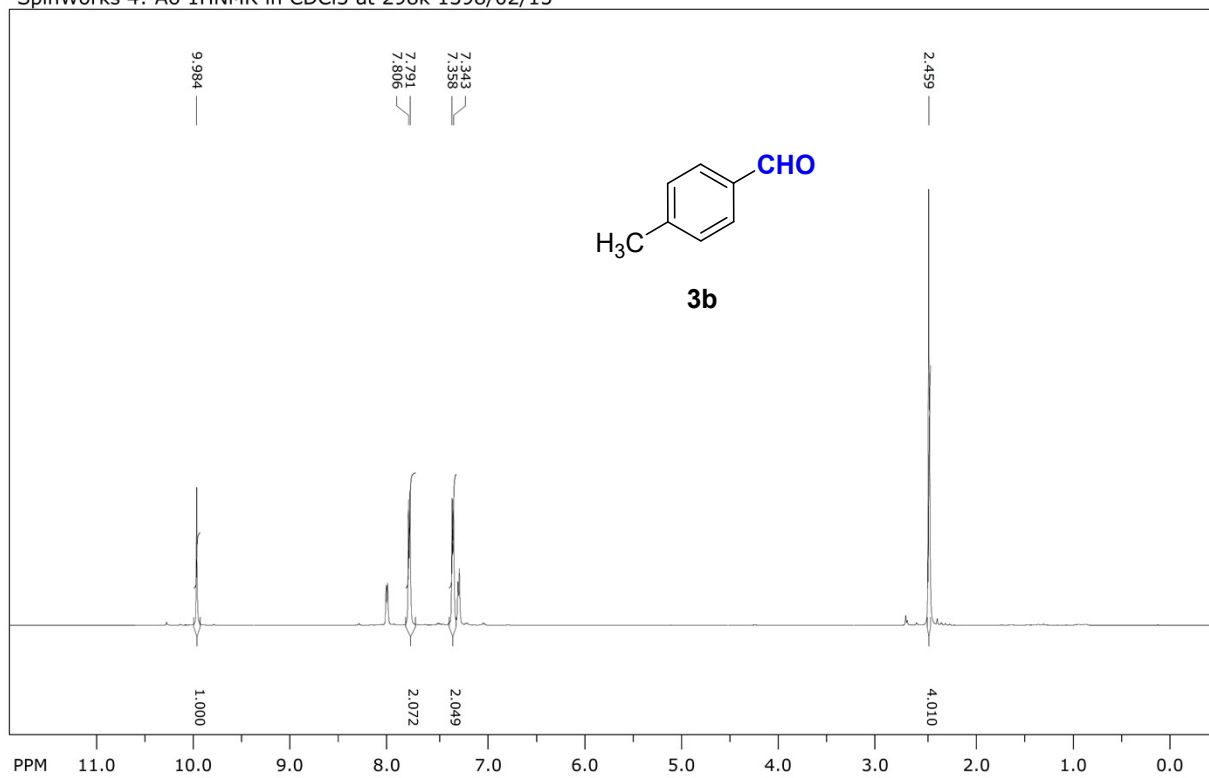

file: ...ezanoor\MIL-88a\75 4-Me benzal\fid expt: <zg30>  
transmitter freq.: 500.133089 MHz  
time domain size: 30988 points  
width: 10330.58 Hz = 20.6557 ppm = 0.333374 Hz/pt  
number of scans: 16

freq. of 0 ppm: 500.130000 MHz  
processed size: 32768 complex points  
LB: 0.300 GF: 0.0000  
Hz/cm: 247.595 ppm/cm: 0.49506

SpinWorks 4: A6 1HNMR in CDCl3 at 298k 1398/02/15

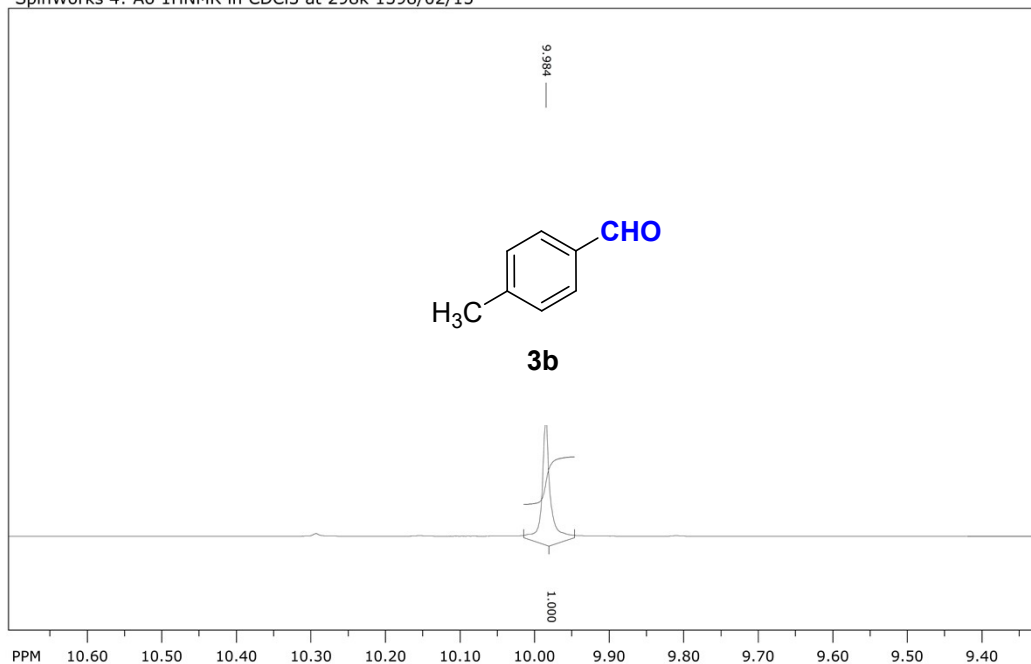

file: ...ezanoor\MIL-88a\75 4-Me benzal\fid expt: <zg30>  
transmitter freq.: 500.133089 MHz  
time domain size: 30988 points  
width: 10330.58 Hz = 20.6557 ppm = 0.333374 Hz/pt  
number of scans: 16

freq. of 0 ppm: 500.130000 MHz  
processed size: 32768 complex points  
LB: 0.300 GF: 0.0000  
Hz/cm: 27.791 ppm/cm: 0.05557

SpinWorks 4: A6 1HNMR in CDCl3 at 298k 1398/02/15

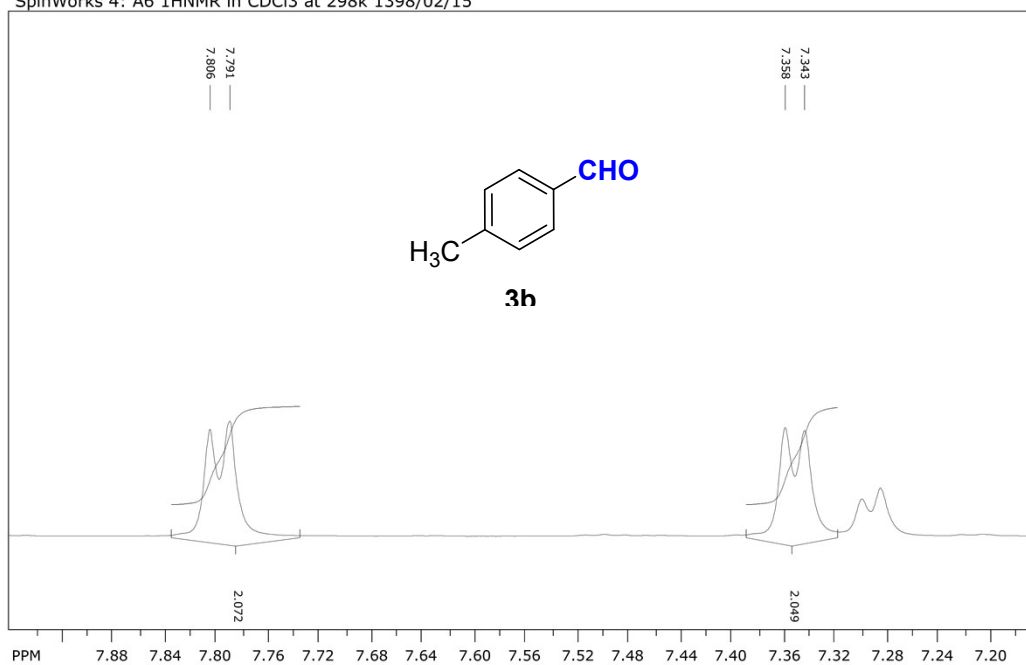

file: ...ezanoor\MIL-88a\75 4-Me benzal\fid expt: <zg30>  
transmitter freq.: 500.133089 MHz  
time domain size: 30988 points  
width: 10330.58 Hz = 20.6557 ppm = 0.333374 Hz/pt  
number of scans: 16

freq. of 0 ppm: 500.130000 MHz  
processed size: 32768 complex points  
LB: 0.300 GF: 0.0000  
Hz/cm: 16.008 ppm/cm: 0.03201

SpinWorks 4: A7 1HNMR in CDCl3 at 298k 1398/02/15

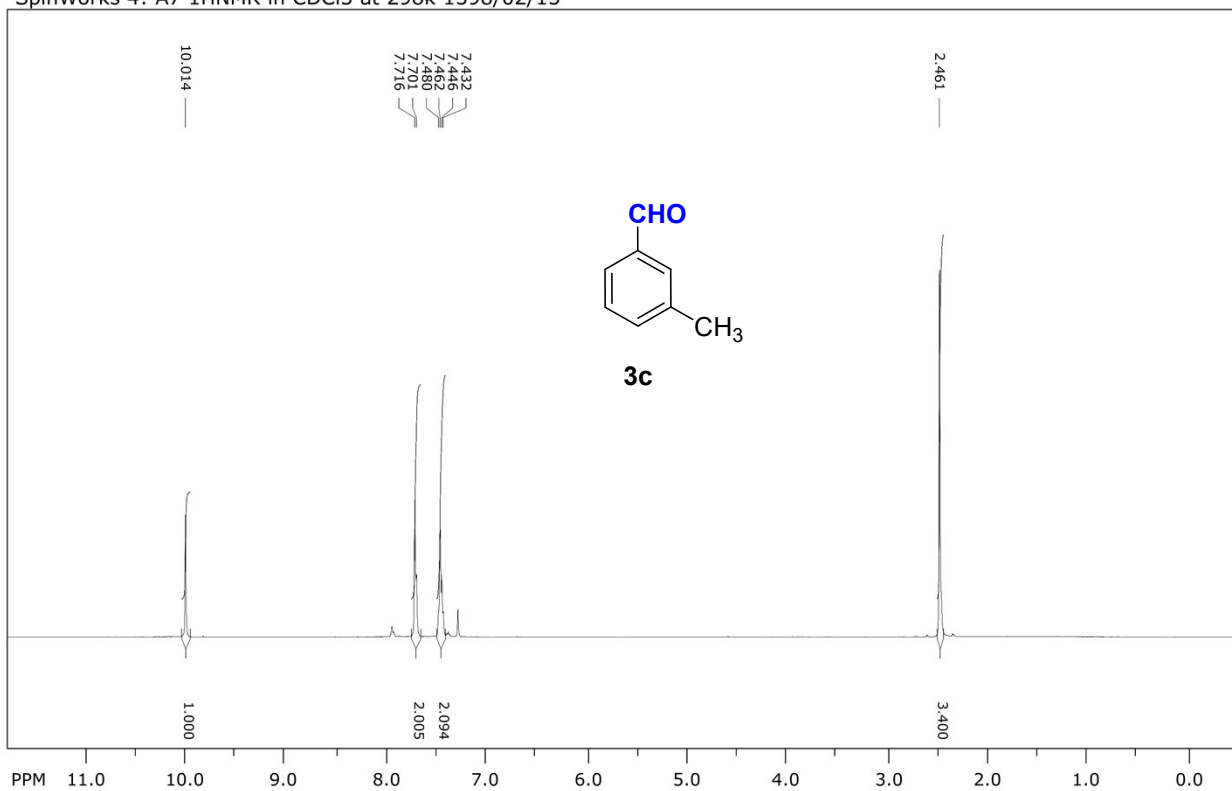

file: ...r\MIL-88a\76 3-Me benzaldehyde\fid exp: <zg30>  
transmitter freq.: 500.133089 MHz  
time domain size: 30988 points  
width: 10330.58 Hz = 20.6557 ppm = 0.333374 Hz/pt  
number of scans: 16

freq. of 0 ppm: 500.130000 MHz  
processed size: 32768 complex points  
LB: 0.300 GF: 0.0000  
Hz/cm: 245.739 ppm/cm: 0.49135

SpinWorks 4: A7 1HNMR in CDCl3 at 298k 1398/02/15

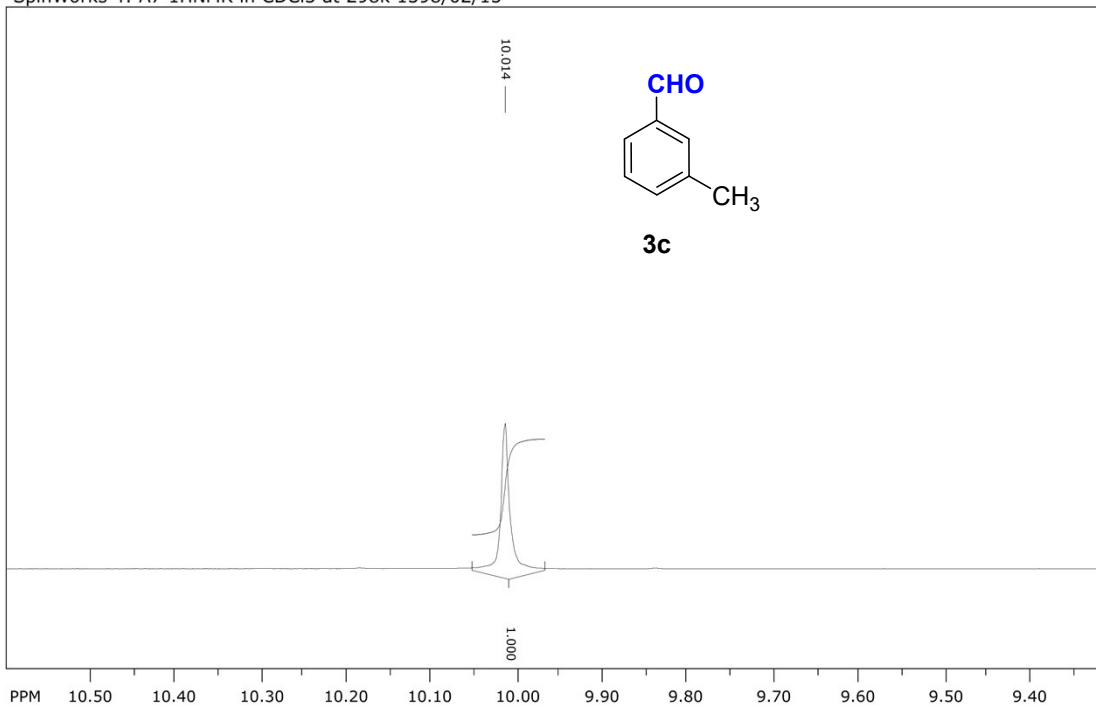

file: ...r\MIL-88a\76 3-Me benzaldehyde\fid expt: <zg30>  
transmitter freq.: 500.133089 MHz  
time domain size: 30988 points  
width: 10330.58 Hz = 20.6557 ppm = 0.333374 Hz/pt  
number of scans: 16

freq. of 0 ppm: 500.130000 MHz  
processed size: 32768 complex points  
LB: 0.300 GF: 0.0000  
Hz/cm: 25.819 ppm/cm: 0.05162

SpinWorks 4: A7 1HNMR in CDCl3 at 298k 1398/02/15

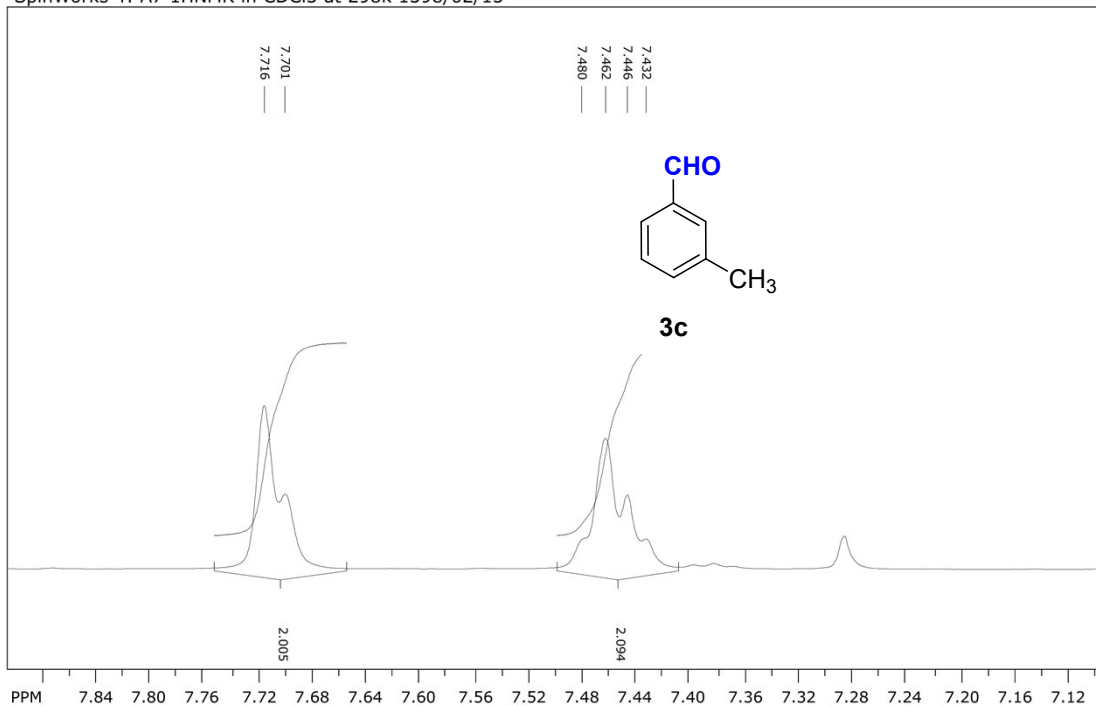

file: ...r\MIL-88a\76 3-Me benzaldehyde\fid expt: <zg30>  
transmitter freq.: 500.133089 MHz  
time domain size: 30988 points  
width: 10330.58 Hz = 20.6557 ppm = 0.333374 Hz/pt  
number of scans: 16

freq. of 0 ppm: 500.130000 MHz  
processed size: 32768 complex points  
LB: 0.300 GF: 0.0000  
Hz/cm: 16.357 ppm/cm: 0.03270



SpinWorks 4: A7 1HNMR in CDCl3 at 298k 1398/02/15

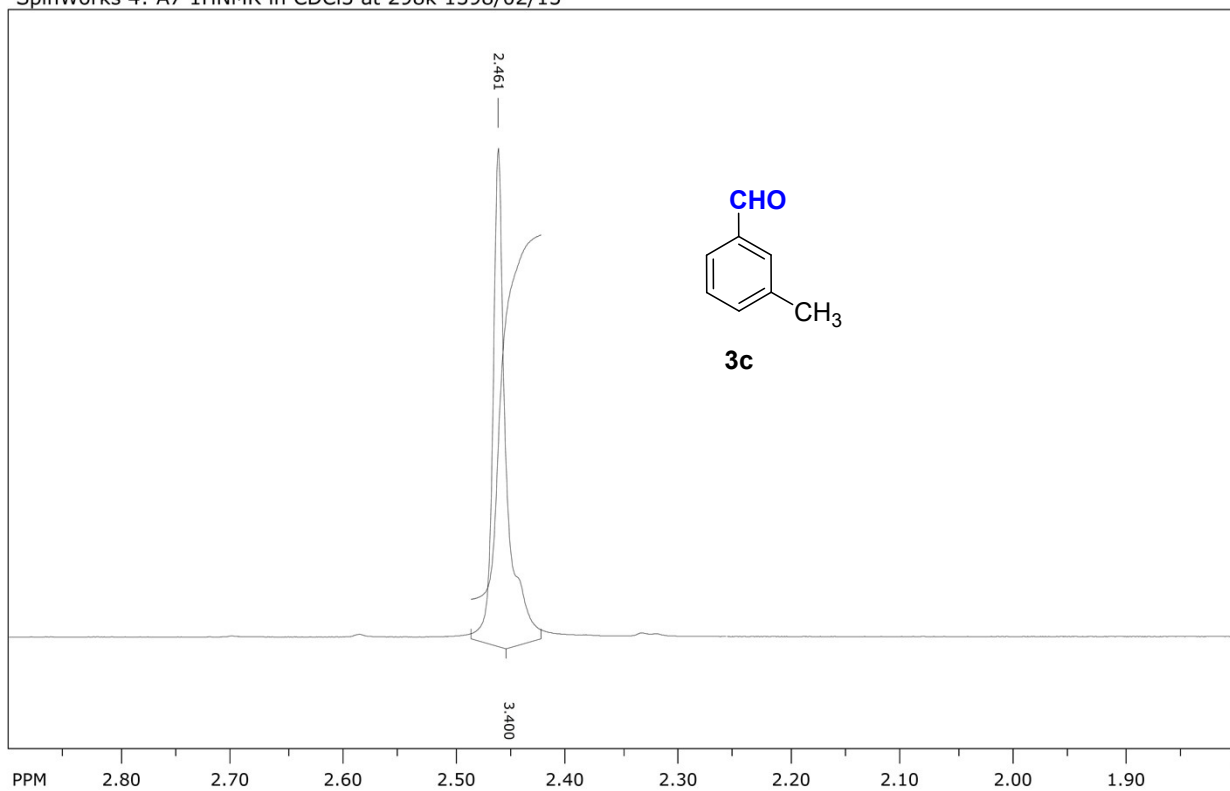

file: ...[MIL-88a\76 3-Me benzaldehyde\fid expt: <zg30>  
transmitter freq.: 500.133089 MHz  
time domain size: 30988 points  
width: 10330.58 Hz = 20.6557 ppm = 0.333374 Hz/pt  
number of scans: 16

freq. of 0 ppm: 500.130000 MHz  
processed size: 32768 complex points  
LB: 0.300 GF: 0.0000  
Hz/cm: 22.050 ppm/cm: 0.04409

SpinWorks 4: A8 1HNMR in CDCl3 at 298k 1398/02/15

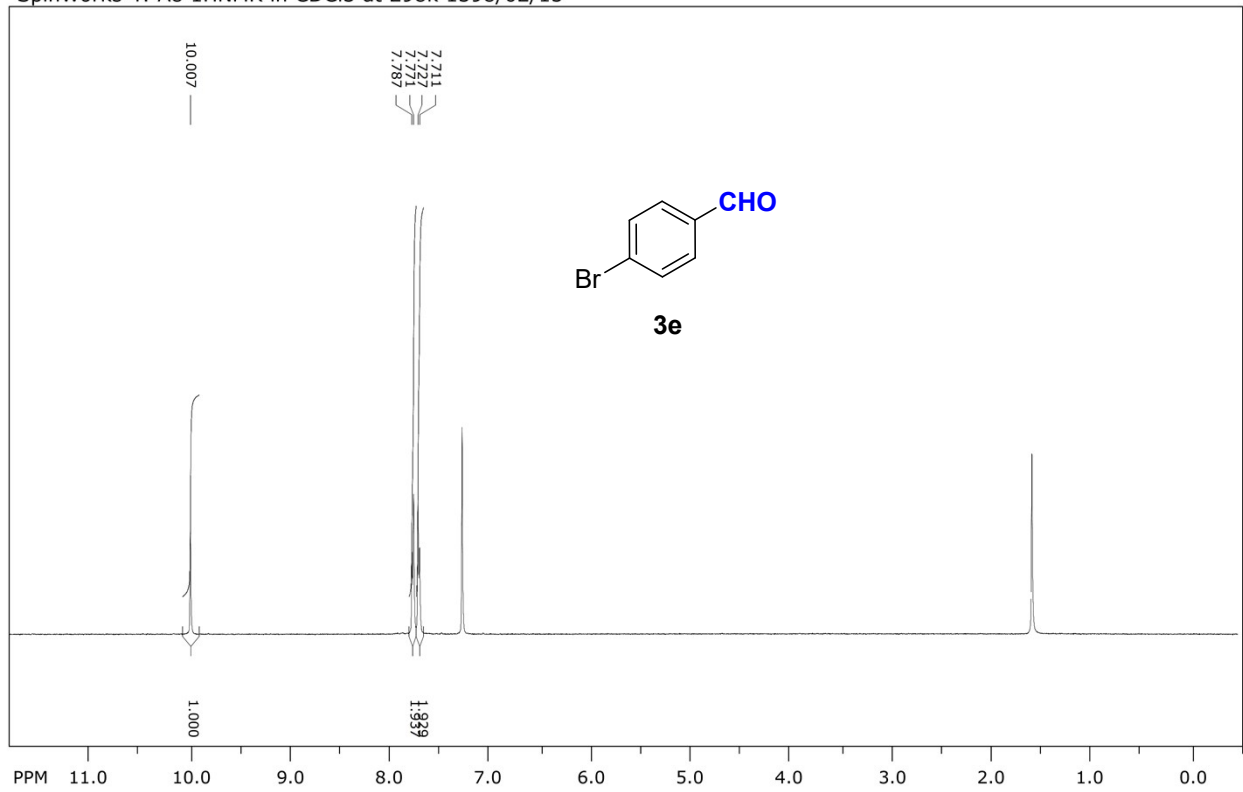

file: ...ezanoor\MIL-88a\77 4-Br benzal\fid expt: <zg30>  
transmitter freq.: 500.133089 MHz  
time domain size: 30988 points  
width: 10330.58 Hz = 20.6557 ppm = 0.333374 Hz/pt  
number of scans: 16

freq. of 0 ppm: 500.130000 MHz  
processed size: 32768 complex points  
LB: 0.300 GF: 0.0000  
Hz/cm: 246.210 ppm/cm: 0.49229

SpinWorks 4: A8 1HNMR in CDCl3 at 298k 1398/02/15

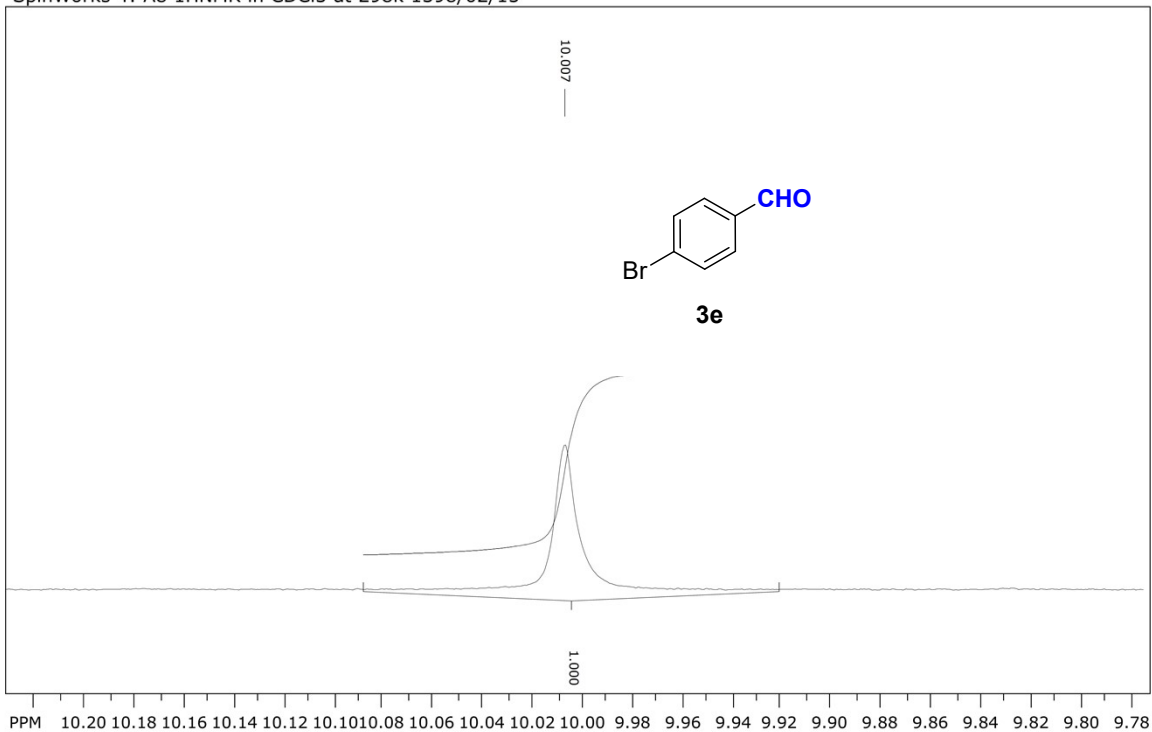

file: ...ezanoor\MIL-88a\77 4-Br benzal\fid expt: <zg30>  
transmitter freq.: 500.133089 MHz  
time domain size: 30988 points  
width: 10330.58 Hz = 20.6557 ppm = 0.333374 Hz/pt  
number of scans: 16

freq. of 0 ppm: 500.130000 MHz  
processed size: 32768 complex points  
LB: 0.300 GF: 0.0000  
Hz/cm: 9.200 ppm/cm: 0.01839

SpinWorks 4: A8 1HNMR in CDCl3 at 298k 1398/02/15

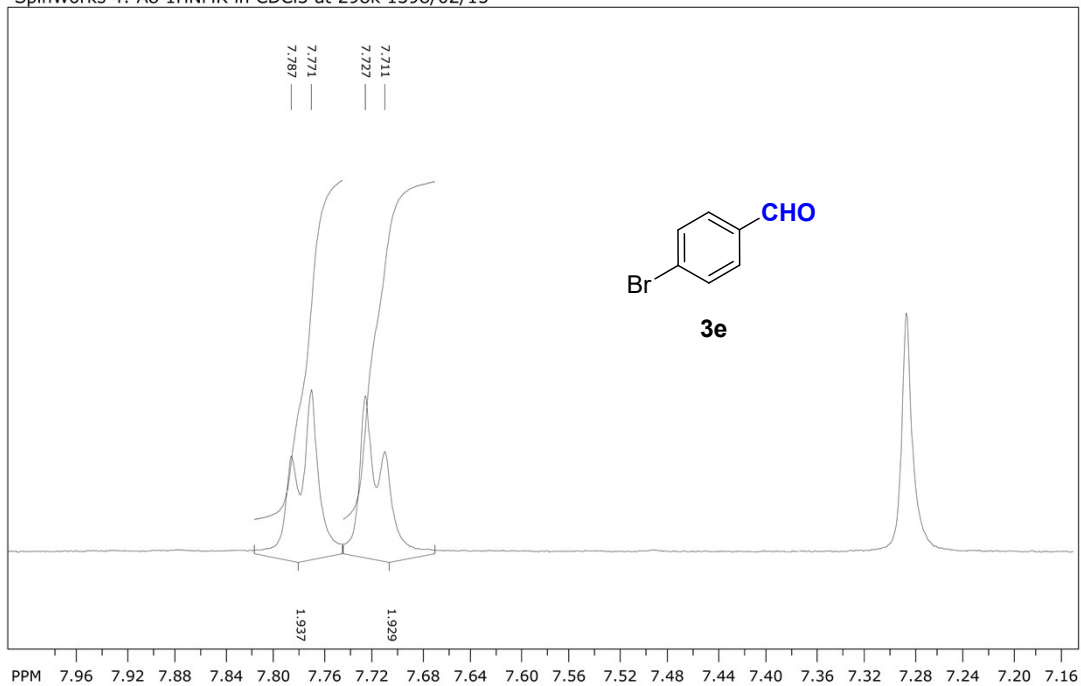

file: ...ezanoor\MIL-88a\77 4-Br benzal\fid expt: <zg30>  
transmitter freq.: 500.133089 MHz  
time domain size: 30988 points  
width: 10330.58 Hz = 20.6557 ppm = 0.333374 Hz/pt  
number of scans: 16

freq. of 0 ppm: 500.130000 MHz  
processed size: 32768 complex points  
LB: 0.300 GF: 0.0000  
Hz/cm: 17.405 ppm/cm: 0.03480

SpinWorks 4: Rezanoor 4F 1HNMR in CDCl3 at 298k 1398/06/24

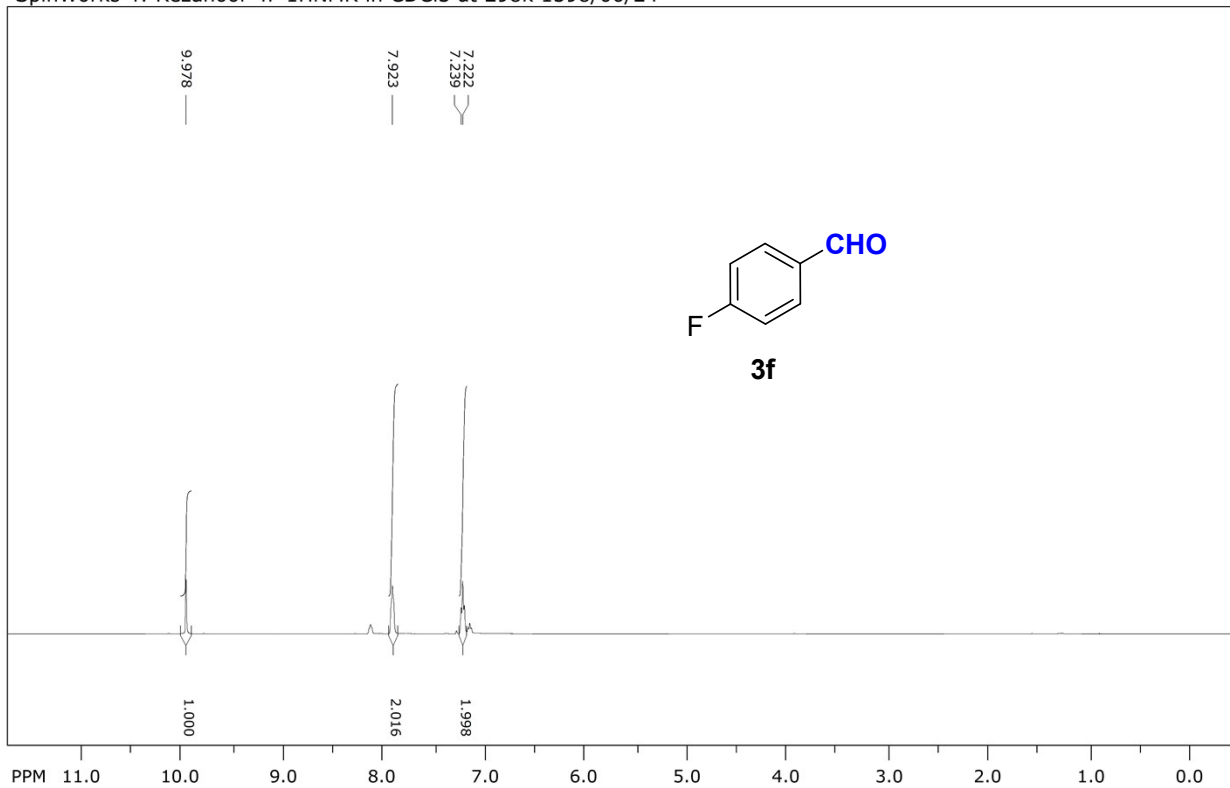

file: ...ta\rezanoor\MIL-88a\4-F benzal\fid expt: <zg30>  
transmitter freq.: 500.134501 MHz  
time domain size: 30988 points  
width: 10964.91 Hz = 21.9239 ppm = 0.353844 Hz/pt  
number of scans: 8

freq. of 0 ppm: 500.130000 MHz  
processed size: 32768 complex points  
LB: 0.300 GF: 0.0000  
Hz/cm: 244.351 ppm/cm: 0.48857

SpinWorks 4: Rezanoor 4F 1HNMR in CDCl3 at 298k 1398/06/24

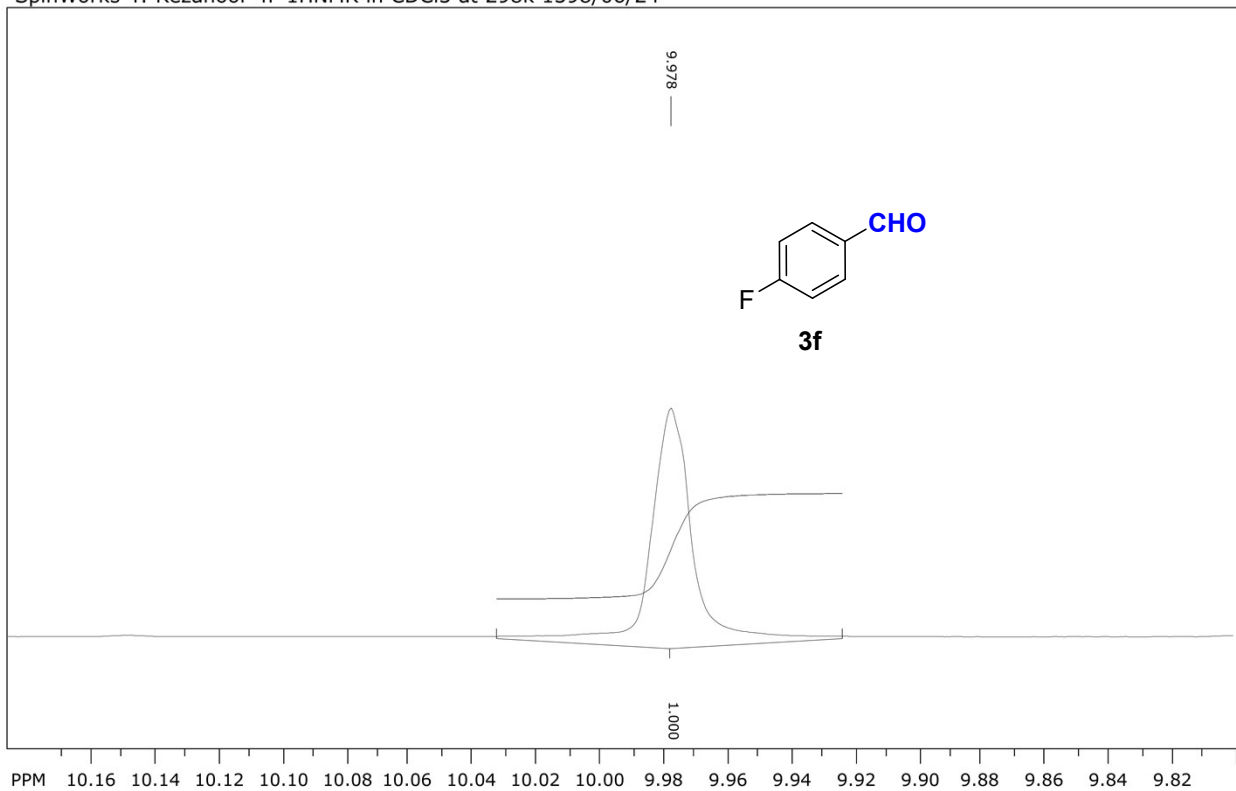

file: ...ta\rezanoor\MIL-88a\4-F benzal\fid expt: <zg30>  
transmitter freq.: 500.134501 MHz  
time domain size: 30988 points  
width: 10964.91 Hz = 21.9239 ppm = 0.353844 Hz/pt  
number of scans: 8

freq. of 0 ppm: 500.130000 MHz  
processed size: 32768 complex points  
LB: 0.300 GF: 0.0000  
Hz/cm: 7.763 ppm/cm: 0.01552

SpinWorks 4: A11 1HNMR in CDCl3 at 298k 1398/02/15

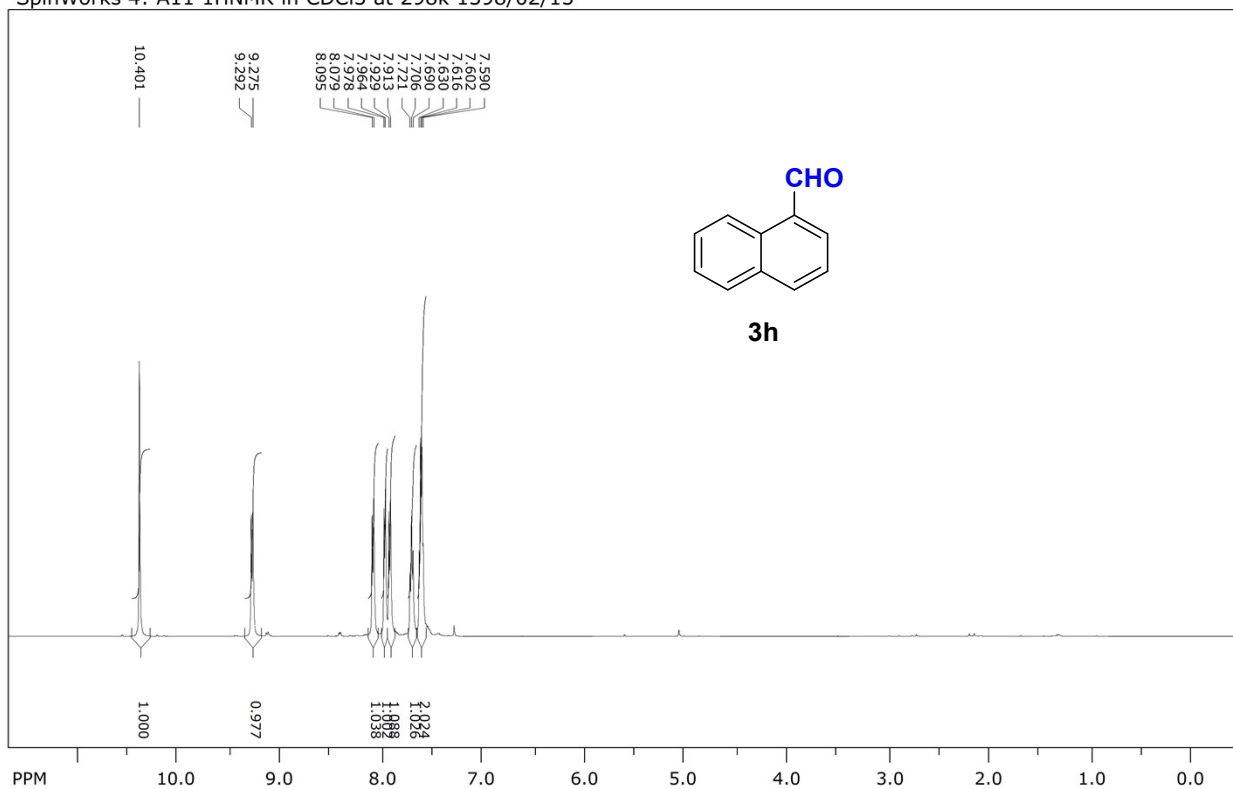

file: ...noor\MIL-88a\81 Naphthaldehyde\fid expt: <zg30>  
transmitter freq.: 500.133089 MHz  
time domain size: 30988 points  
width: 10330.58 Hz = 20.6557 ppm = 0.333374 Hz/pt  
number of scans: 16

freq. of 0 ppm: 500.130000 MHz  
processed size: 32768 complex points  
LB: 0.300 GF: 0.0000  
Hz/cm: 242.915 ppm/cm: 0.48570

SpinWorks 4: A11 1HNMR in CDCl3 at 298k 1398/02/15

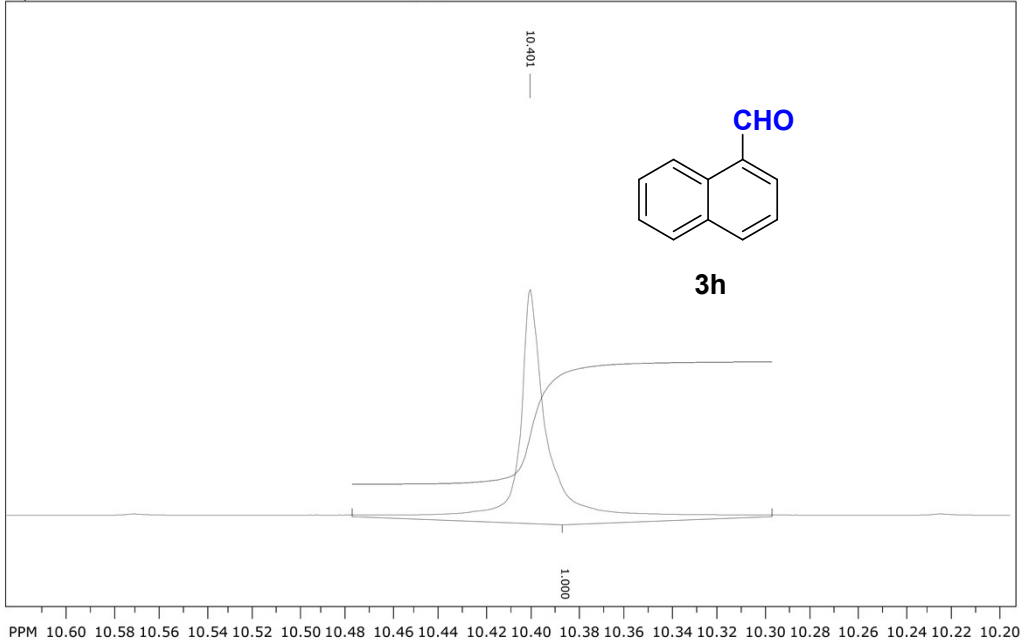

file: ...nor\MIL-88a\81 Naphthaldehyde\fid expt: <zg30>  
transmitter freq.: 500.133089 MHz  
time domain size: 30988 points  
width: 10330.58 Hz = 20.6557 ppm = 0.333374 Hz/pt  
number of scans: 16

freq. of 0 ppm: 500.130000 MHz  
processed size: 32768 complex points  
LB: 0.300 GF: 0.0000  
Hz/cm: 8.676 ppm/cm: 0.01735

SpinWorks 4: A11 1HNMR in CDCl3 at 298k 1398/02/15

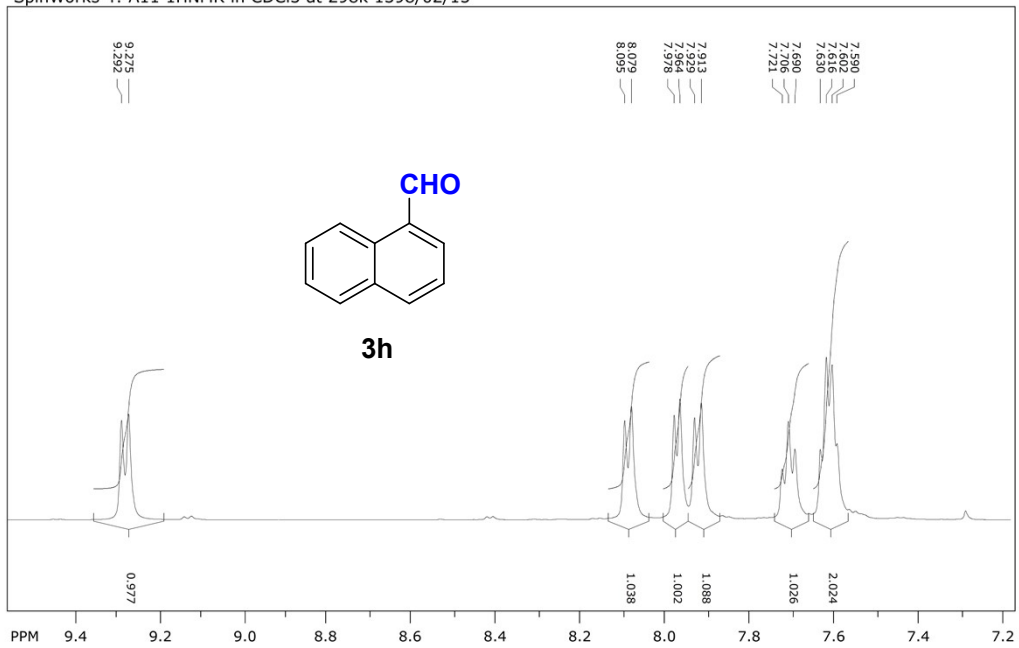

file: ...nor\MIL-88a\81 Naphthaldehyde\fid expt: <zg30>  
transmitter freq.: 500.133089 MHz  
time domain size: 30988 points  
width: 10330.58 Hz = 20.6557 ppm = 0.333374 Hz/pt  
number of scans: 16

freq. of 0 ppm: 500.130000 MHz  
processed size: 32768 complex points  
LB: 0.300 GF: 0.0000  
Hz/cm: 47.754 ppm/cm: 0.09548

SpinWorks 4: A5 1HNMR in CDCl3 at 298k 1398/02/15

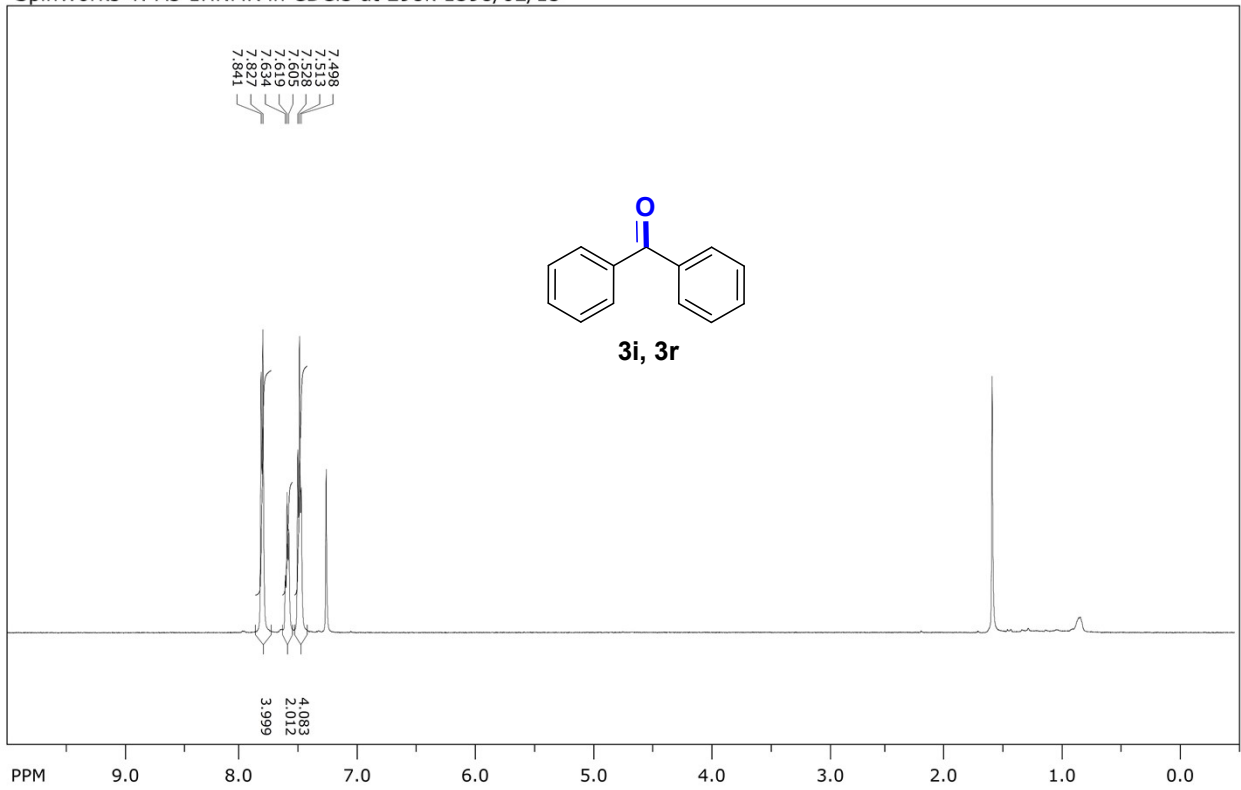

file: ...zanoor\MIL-88a\74 Benzophenone\fid expt: <zg30>  
transmitter freq.: 500.133089 MHz  
time domain size: 30988 points  
width: 10330.58 Hz = 20.6557 ppm = 0.333374 Hz/pt  
number of scans: 16

freq. of 0 ppm: 500.130000 MHz  
processed size: 32768 complex points  
LB: 0.300 GF: 0.0000  
Hz/cm: 210.007 ppm/cm: 0.41990



SpinWorks 4: A5 1HNMR in CDCl3 at 298k 1398/02/15

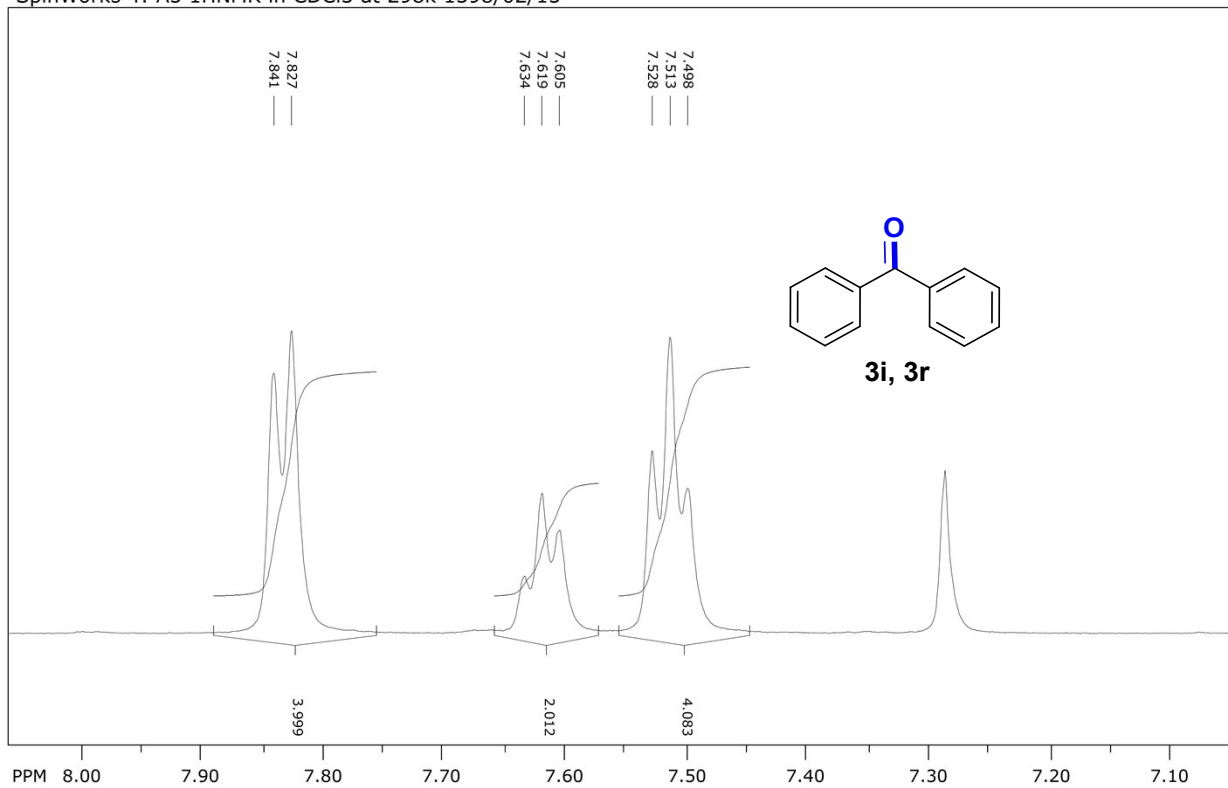

file: ...zanoor\MIL-88a\74 Benzophenone\fid expt: <zg30>  
transmitter freq.: 500.133089 MHz  
time domain size: 30988 points  
width: 10330.58 Hz = 20.6557 ppm = 0.333374 Hz/pt  
number of scans: 16

freq. of 0 ppm: 500.130000 MHz  
processed size: 32768 complex points  
LB: 0.300 GF: 0.0000  
Hz/cm: 20.311 ppm/cm: 0.04061

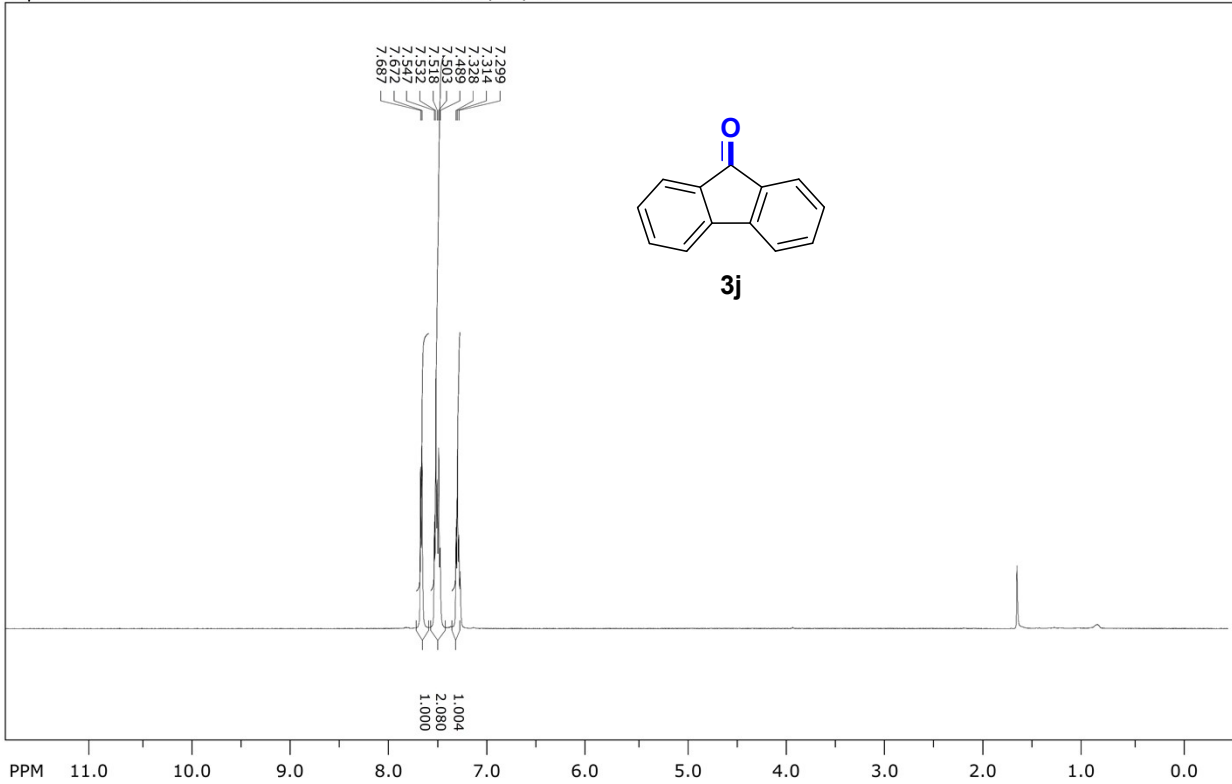

file: ...rezanoor\MIL-88a\72 Fluorenone\fid expt: <zg30>  
transmitter freq.: 500.133089 MHz  
time domain size: 30988 points  
width: 10330.58 Hz = 20.6557 ppm = 0.333374 Hz/pt  
number of scans: 16

freq. of 0 ppm: 500.130000 MHz  
processed size: 32768 complex points  
LB: 0.300 GF: 0.0000  
Hz/cm: 247.496 ppm/cm: 0.49486

SpinWorks 4: A3 1HNMR in CDCl3 at 298k 1398/02/15

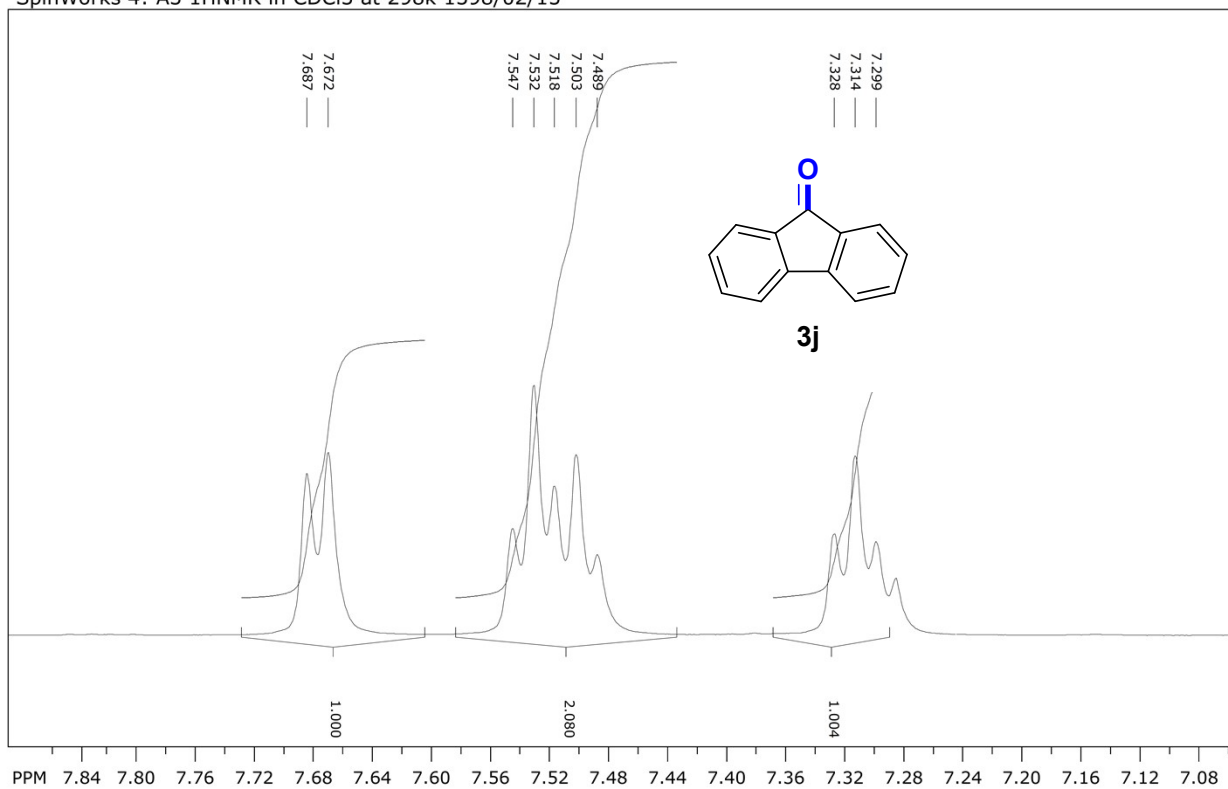

file: ...rezanoor\MIL-88a\72 Fluorenone\fid expt: <zg30>  
transmitter freq.: 500.133089 MHz  
time domain size: 30988 points  
width: 10330.58 Hz = 20.6557 ppm = 0.333374 Hz/pt  
number of scans: 16

freq. of 0 ppm: 500.130000 MHz  
processed size: 32768 complex points  
LB: 0.300 GF: 0.0000  
Hz/cm: 16.688 ppm/cm: 0.03337

SpinWorks 4: A1 1HNMR in CDCl3 at 298k 1398/02/15

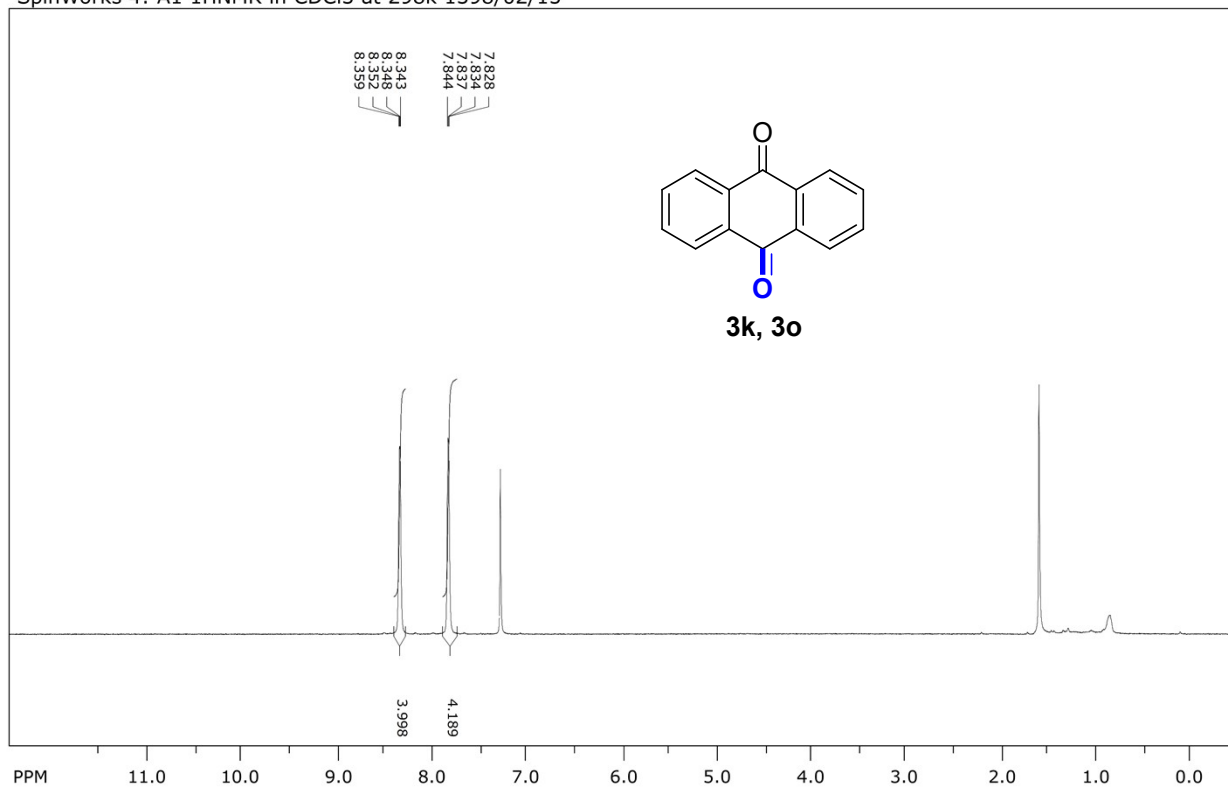

file: ...anoor\MIL-88a\70 Anthraquinone\fid exp: <zg30>  
transmitter freq.: 500.133089 MHz  
time domain size: 30988 points  
width: 10330.58 Hz = 20.6557 ppm = 0.333374 Hz/pt  
number of scans: 16

freq. of 0 ppm: 500.130000 MHz  
processed size: 32768 complex points  
LB: 0.300 GF: 0.0000  
Hz/cm: 259.105 ppm/cm: 0.51807

SpinWorks 4: A1 1HNMR in CDCl3 at 298k 1398/02/15

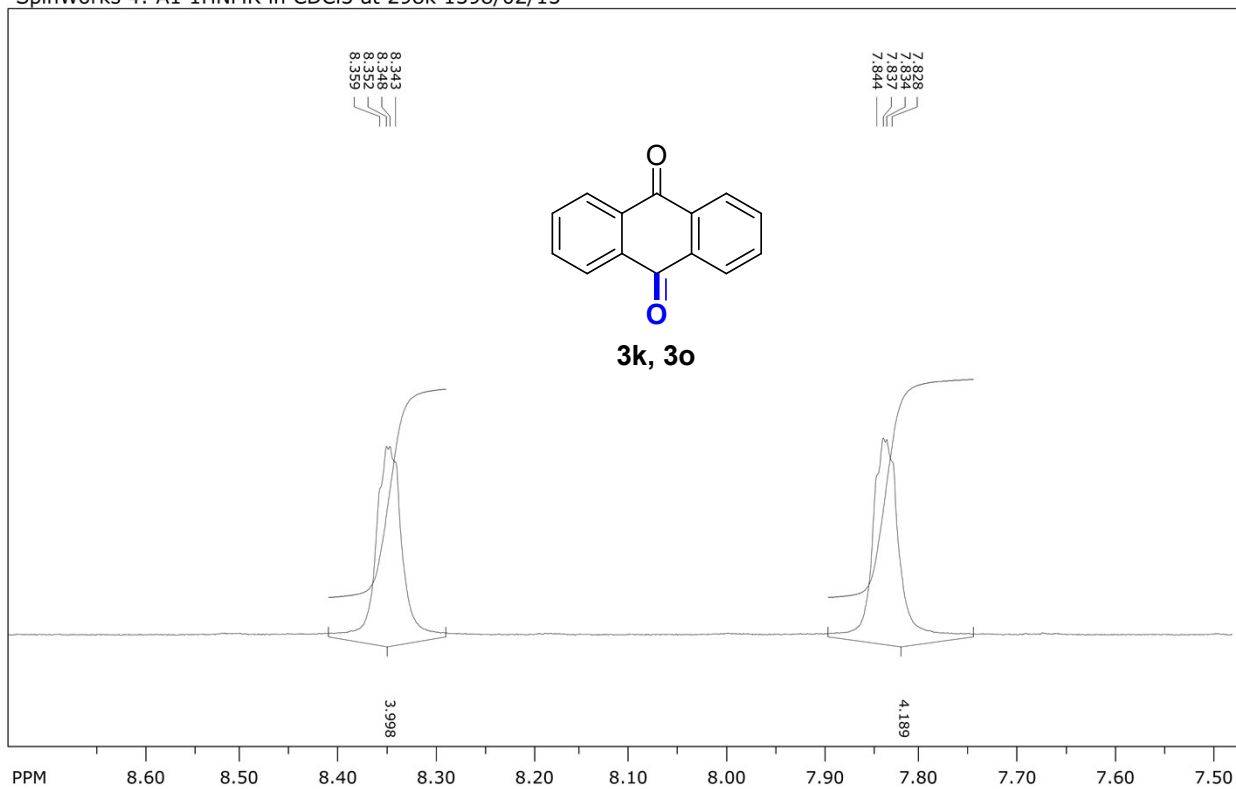

file: ...anoor\MIL-88a\70 Anthraquinone\fid expt: <zg30>  
transmitter freq.: 500.133089 MHz  
time domain size: 30988 points  
width: 10330.58 Hz = 20.6557 ppm = 0.333374 Hz/pt  
number of scans: 16

freq. of 0 ppm: 500.130000 MHz  
processed size: 32768 complex points  
LB: 0.300 GF: 0.0000  
Hz/cm: 25.384 ppm/cm: 0.05075

SpinWorks 4: A2 1HNMR in CDCl3 at 298k 1398/02/15

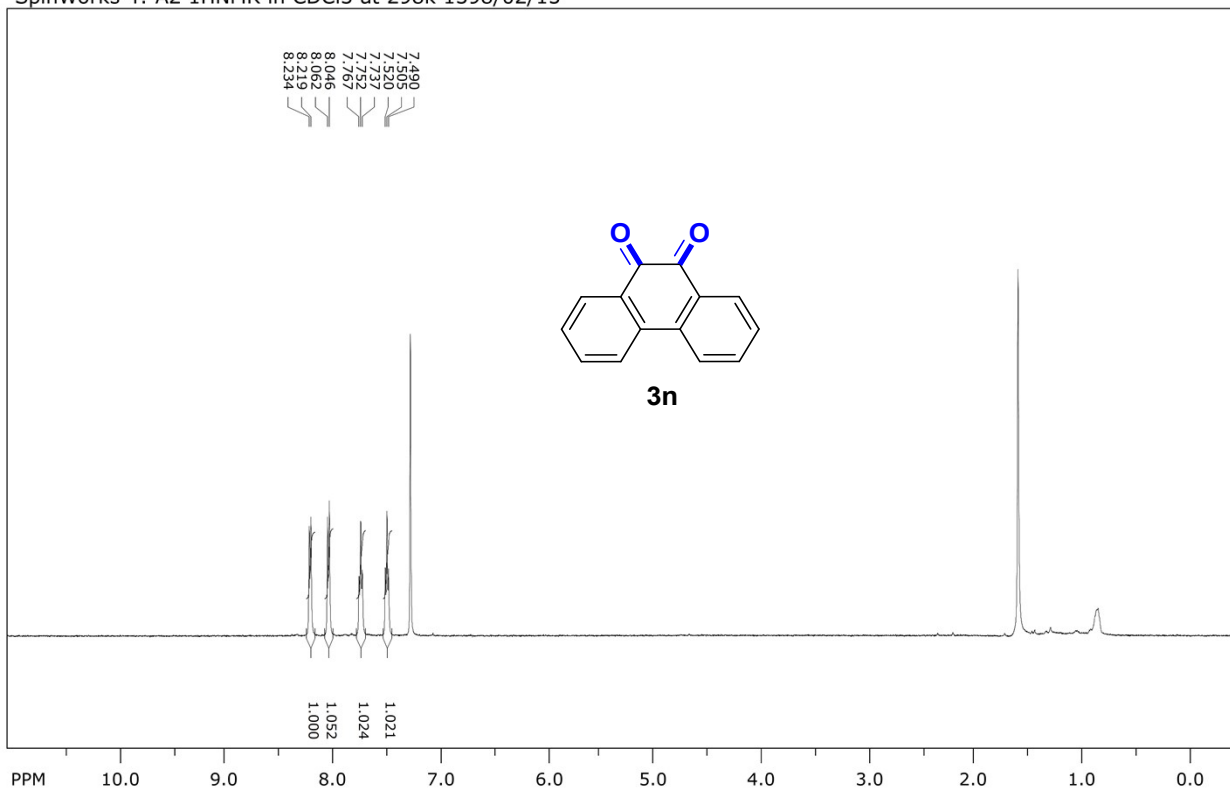

file: ...MIL-88a\71 Phenanthroquinone\fid exp: <zg30>  
transmitter freq.: 500.133089 MHz  
time domain size: 30988 points  
width: 10330.58 Hz = 20.6557 ppm = 0.333374 Hz/pt  
number of scans: 16

freq. of 0 ppm: 500.130000 MHz  
processed size: 32768 complex points  
LB: 0.300 GF: 0.0000  
Hz/cm: 230.382 ppm/cm: 0.46064

SpinWorks 4: A2 1HNMR in CDCl3 at 298k 1398/02/15

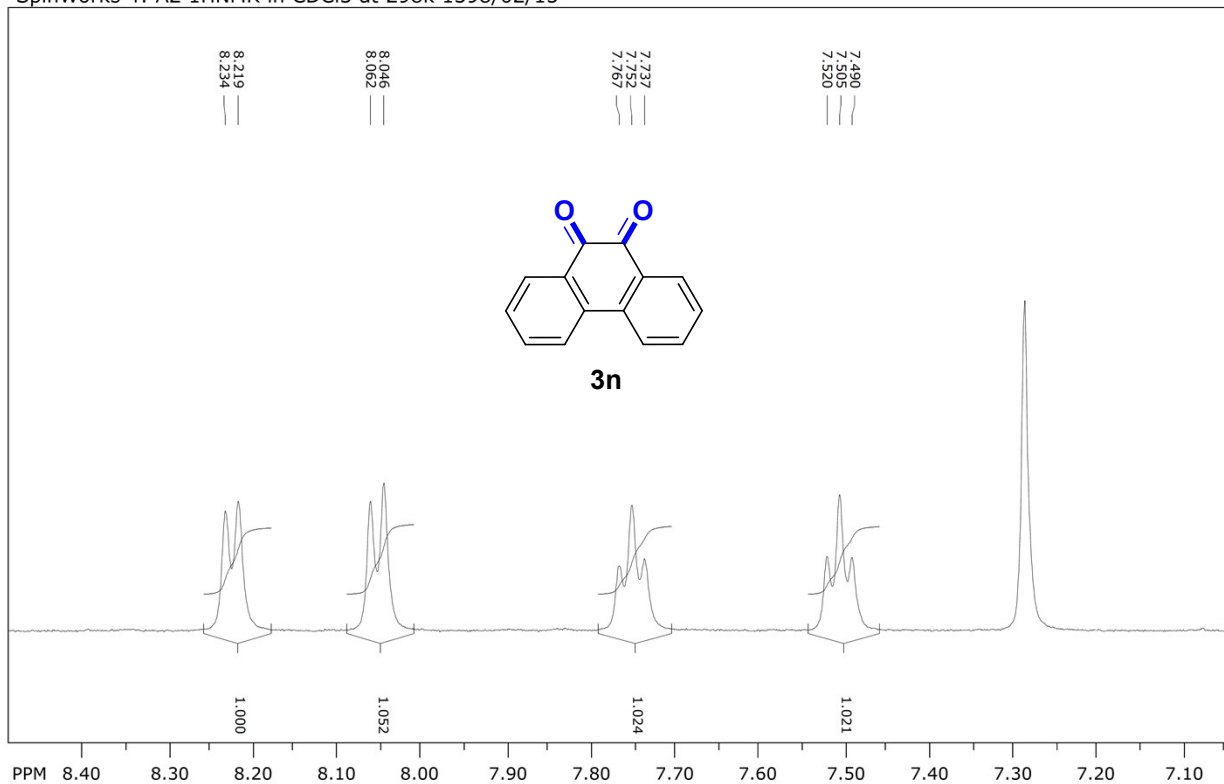

file: ...r\MIL-88a\71 Phenanthroquinone\fid exp: <zg30>  
transmitter freq.: 500.133089 MHz  
time domain size: 30988 points  
width: 10330.58 Hz = 20.6557 ppm = 0.333374 Hz/pt  
number of scans: 16

freq. of 0 ppm: 500.130000 MHz  
processed size: 32768 complex points  
LB: 0.300 GF: 0.0000  
Hz/cm: 28.970 ppm/cm: 0.05792

SpinWorks 4: A4 1HNMR in CDCl3 at 298k 1398/02/15

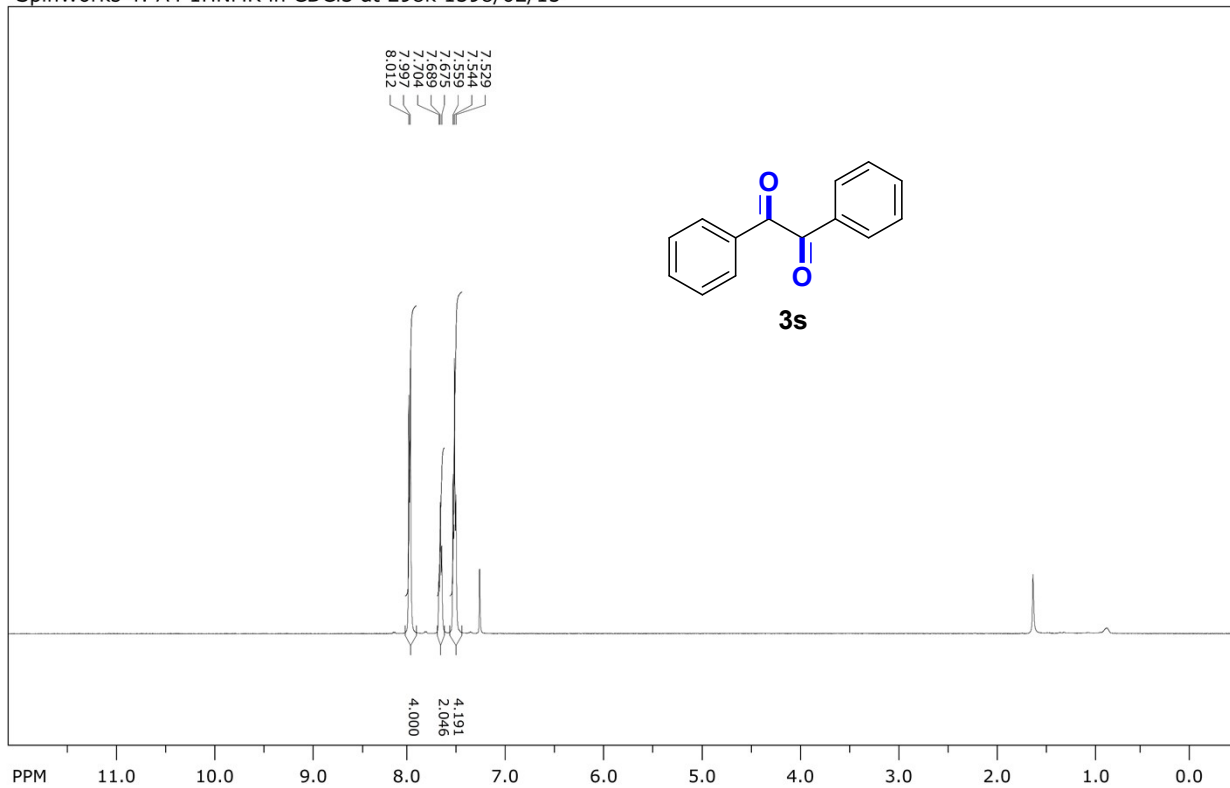

file: ...ata\rezanoor\MIL-88a\73 Benzil\fid exp: <zg30>  
transmitter freq.: 500.133089 MHz  
time domain size: 30988 points  
width: 10330.58 Hz = 20.6557 ppm = 0.333374 Hz/pt  
number of scans: 16

freq. of 0 ppm: 500.130000 MHz  
processed size: 32768 complex points  
LB: 0.300 GF: 0.0000  
Hz/cm: 251.855 ppm/cm: 0.50358



SpinWorks 4: A4 1HNMR in CDCl3 at 298k 1398/02/15

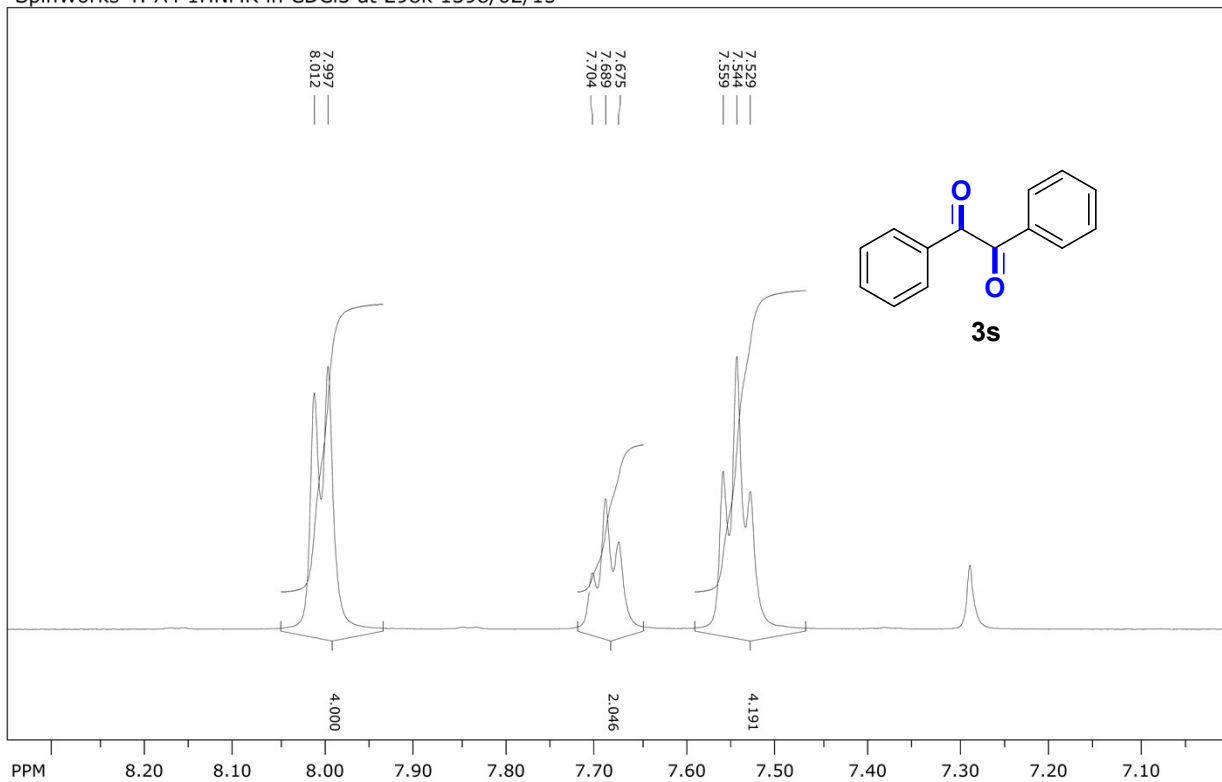

file: ...ata\rezanoor\MIL-88a\73 Benzil\fid exp: <zg30>  
transmitter freq.: 500.133089 MHz  
time domain size: 30988 points  
width: 10330.58 Hz = 20.6557 ppm = 0.333374 Hz/pt  
number of scans: 16

freq. of 0 ppm: 500.130000 MHz  
processed size: 32768 complex points  
LB: 0.300 GF: 0.0000  
Hz/cm: 26.997 ppm/cm: 0.05398
